# Supplementary material for: The genomic landscape of metastatic histologic special types of invasive breast cancer
Source: PubMed Central journal article supplement (PMC7560857; doi:10.1038/s41523-020-00195-4), 2020-10-14
Supplement: 41523_2020_195_MOESM1_ESM.pdf [file 41523_2020_195_MOESM1_ESM.pdf]

## **SUPPLEMENTARY MATERIALS**

**The genomic landscape of metastatic histologic special types of invasive breast cancer**

**Pareja et al.**

**Supplementary Figures 1-7**

**Supplementary Tables 1-6**

**Supplementary Figure 1**

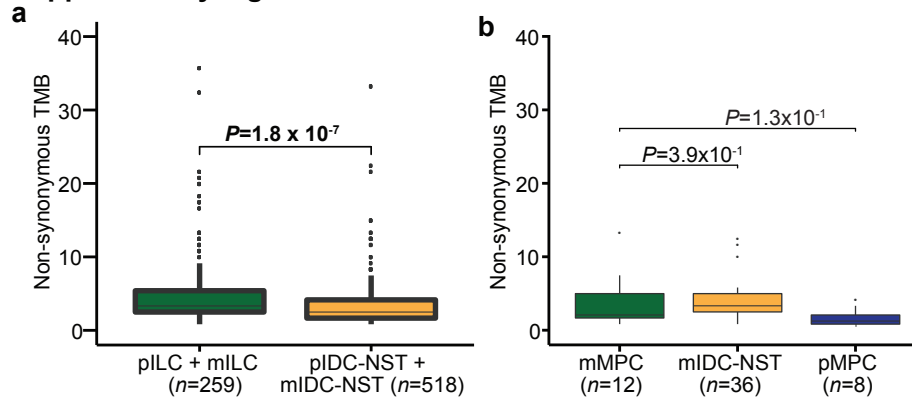

**Supplementary Figure 1. Non-synonymous tumor mutation burden in primary and metastatic breast cancers of special histologic subtypes**

(a-b) Boxplots depicting (a) the non-synonymous tumor mutation burden (TMB) in combined primary and metastatic invasive lobular carcinomas (pILC + mILC, n=259), compared to combined primary and metastatic invasive ductal carcinomas of no special type matched by age, menopausal status, estrogen receptor (ER)/HER2 status and sample type (pIDC-NST + mIDC-NST; n=518) and (e) the non-synonymous TMB metastatic micropapillary carcinomas (mMPC, n=12), metastatic IDC-NSTs matched by clinicopathologic features (mIDC-NST; n=36) and primary micropapillary carcinomas (pMPC; n=8). Mann-Whitney *U* test, two-sided

## Supplementary Figure 2

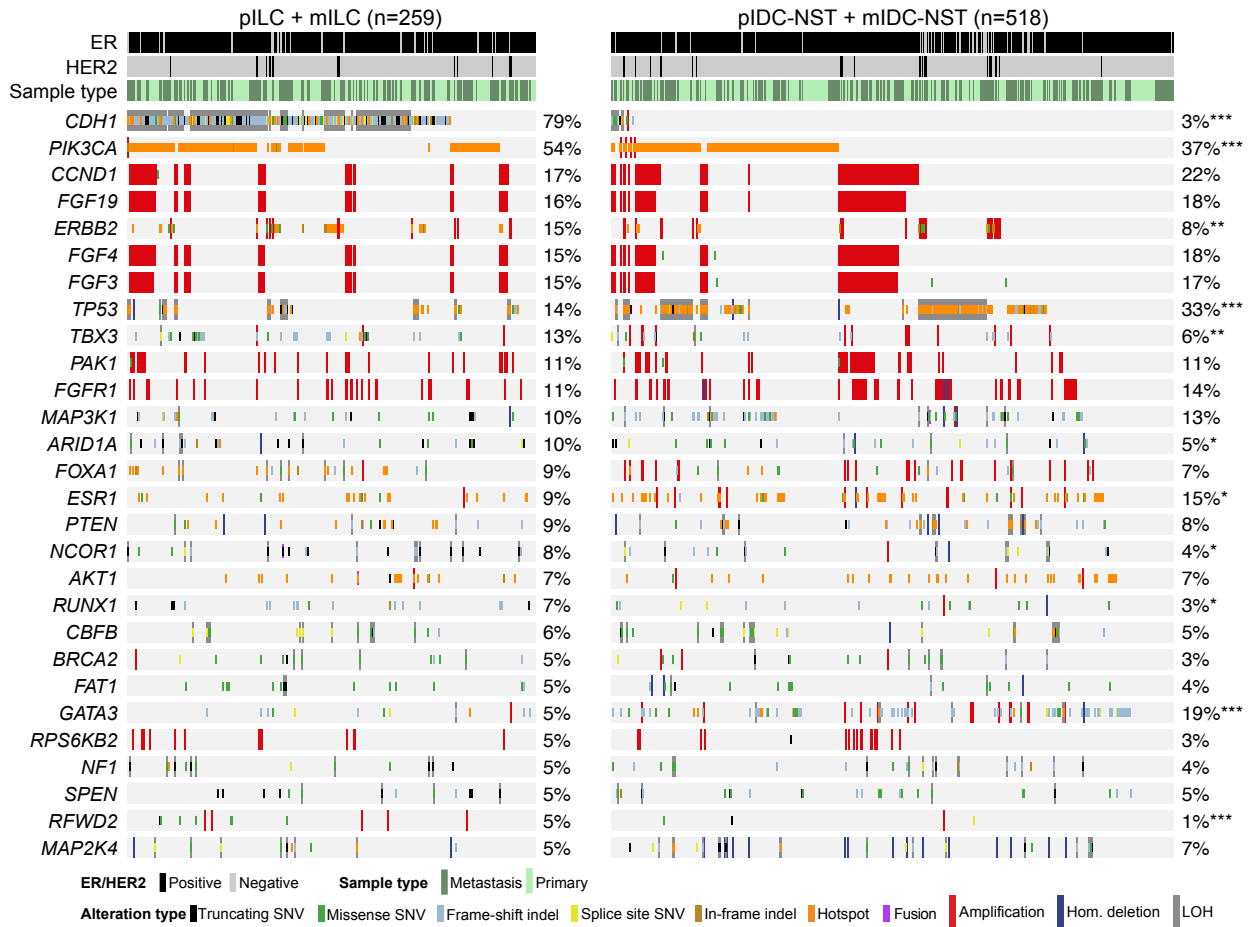

**Supplementary Figure 2. Repertoire of somatic genetic alterations affecting key cancer genes in combined primary and metastatic invasive lobular carcinomas and in matched combined primary and metastatic invasive ductal carcinomas of no special type.** Comparison of the key cancer genes most frequently affected by non-synonymous somatic mutations, amplifications or homozygous deletions in combined primary and metastatic invasive lobular carcinomas (pILC + mILC; n=259), and in metastatic invasive ductal carcinomas of no special type matched by clinicopathologic characteristics ad sample type (pIDC-NST + mIDC-NST; n=518). Cases are shown in columns and genes in rows. Mutation types are color-coded according to the legend. ER/HER2 status are shown in the respective phenobars (top). \*,  $P < 0.05$ , \*\*,  $P < 0.01$ , \*\*\*,  $P < 0.001$ ; Fisher's exact test, two-tailed.

### Supplementary Figure 3

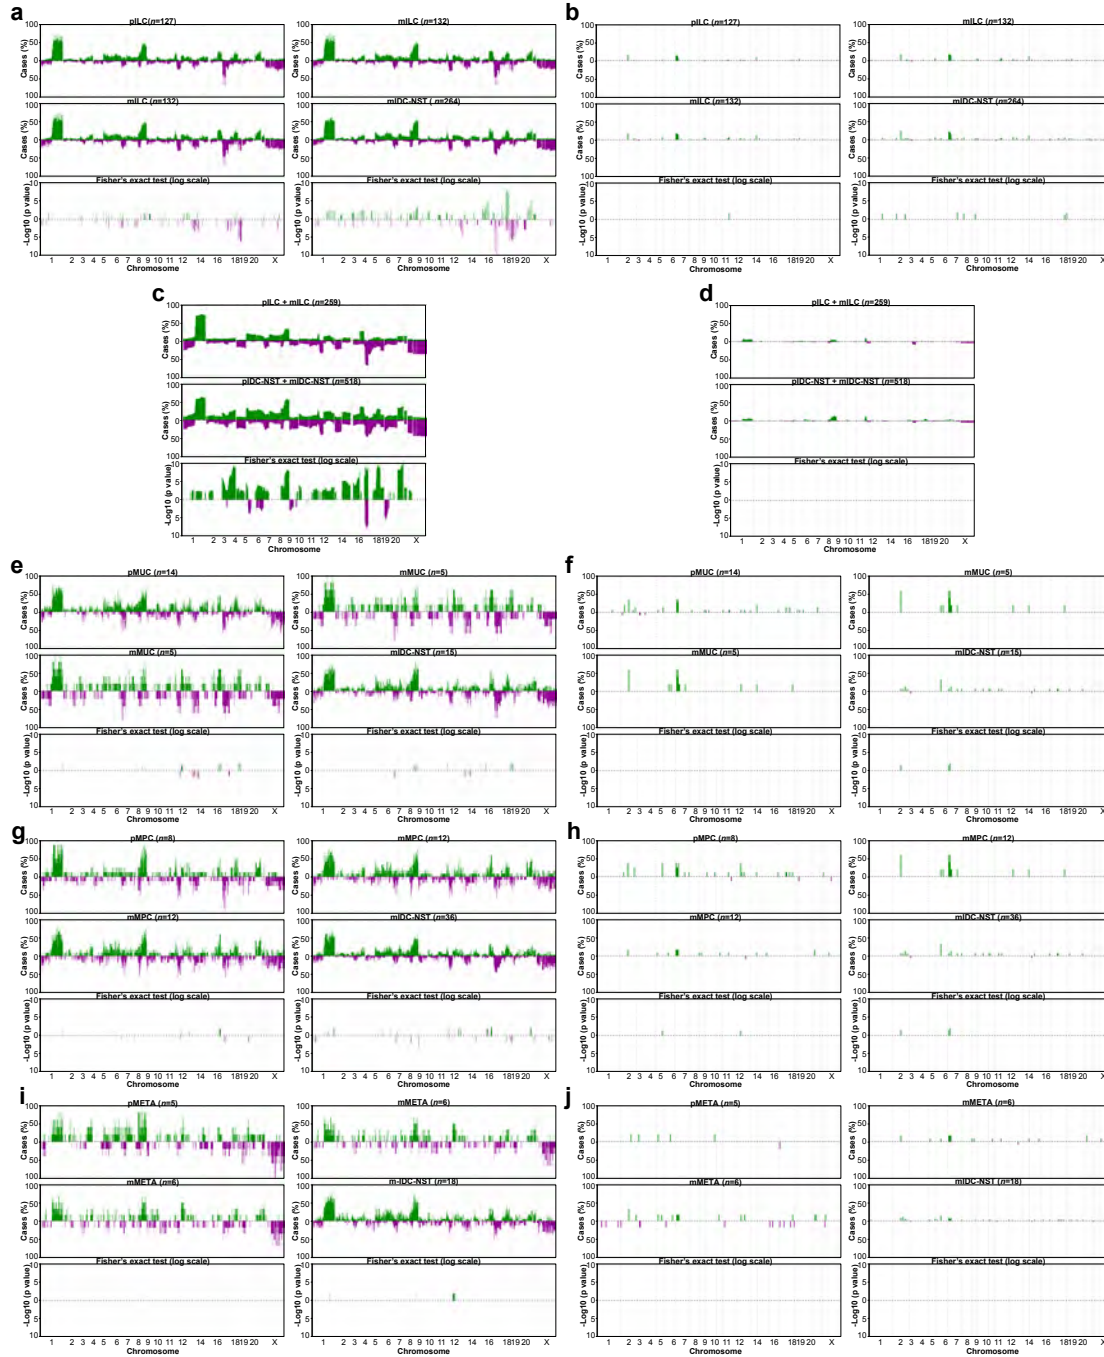

### Supplementary Figure 3. Frequency of copy number alterations in primary and metastatic special histologic subtypes of breast cancer.

Frequency plots and Fisher's exact test comparisons corrected for multiple testing of copy number (a) gains and losses and (b) amplifications and homozygous deletions between metastatic lobular

carcinomas (mILC; n=132) compared to primary invasive lobular carcinomas (pILC; n=127; left), and to metastatic invasive ductal carcinomas of no special type (mIDC-NST) matched by age, menopausal status and estrogen receptor (ER)/HER2 status (n=264; right). **(c)** Gains and losses and **(d)** amplifications and homozygous deletions in combined primary and metastatic lobular carcinomas (pILC + mILC; n=259) and primary and metastatic IDC-NSTs matched by clinicopathologic characteristics and sample type (pIDC-NST + mIDC-NST; n=518). **(e)** Gains and losses and **(f)** amplifications and homozygous deletions between metastatic mixed mucinous breast cancers (mMUC; n=5) compared to primary mixed mucinous breast cancers (pMUC; n=14, left), and to metastatic IDC-NSTs matched by clinicopathologic characteristics (mIDC-NST; n=15, right). **(g)** Gains and losses and **(h)** amplifications and homozygous deletions of metastatic micropapillary breast cancers (mMPC; n=12) compared to primary micropapillary breast cancers (pMPC; n=8, left), and to metastatic IDC-NST matched by clinicopathologic features (mIDC-NST; n=36, right). **(i)** Gains and losses and **(j)** amplifications and homozygous deletions of metastatic metaplastic BCs (mMETA; n=6) compared to primary metaplastic BCs (pMETA; n=5, left), and to metastatic IDC-NST matched by clinicopathologic characteristics (mIDC-NST; n=18, right). Frequency of gains/amplifications (green) or losses/homozygous deletions (purple) is shown for each gene (y-axis), according to genomic position (x-axis). Inverse Log<sub>10</sub> values of the two-sided Fisher's exact test *P*-values are plotted according to genomic location (lower panels).

## Supplementary Figure 4

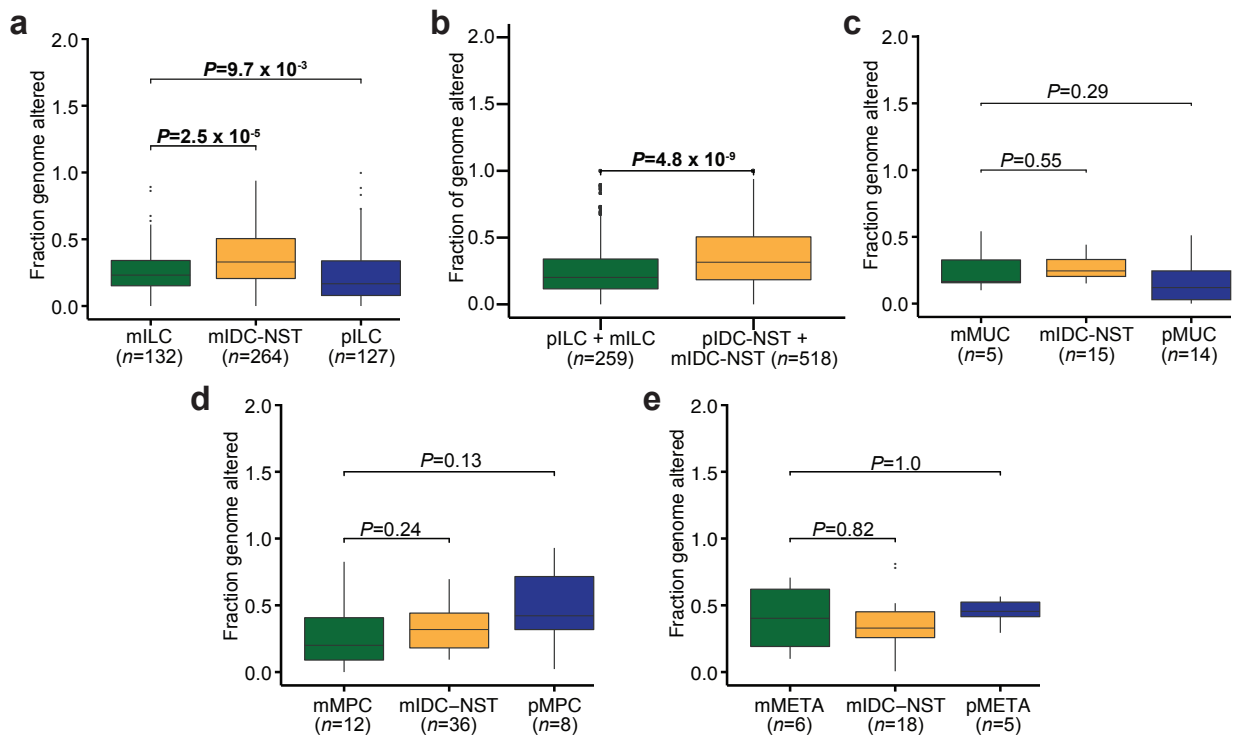

### Supplementary Figure 4. Fraction of genome altered in primary and metastatic special histologic subtypes of breast cancer.

Boxplots depicting the fraction of genome altered (FGA) of (a) metastatic lobular carcinomas (mILC; n=132), metastatic invasive ductal carcinomas of no special type matched by clinicopathologic characteristics (mIDC-NST; n=264) and primary invasive lobular carcinomas (pILC; n=127), (b) combined primary and metastatic lobular carcinomas (pILC + mILC; n=259), with age-, menopausal status-, ER/HER2 status- and sample type-matched combined primary and metastatic IDC-NSTs (pIDC-NST + mIDC-NST; n=518), (c) metastatic mixed mucinous breast cancers (mMUC; n=5), mIDC-NSTs matched by clinicopathologic features (n=15) and primary mixed mucinous carcinomas (pMUC; n=14), (d) metastatic micropapillary breast cancers (mMPC; n=12), mIDC-NST matched by clinicopathologic characteristics (n=36) and primary micropapillary breast cancers (pMPC; n=8), and (e) metastatic metaplastic breast cancers (mMETAs; n=6), mIDC-NSTs matched by clinicopathologic features (n=18) and primary

metaplastic breast cancers (pMETA; n=5). Statistically significant  $P$  values ( $P<0.05$ ) are bolded.

Mann-Whitney  $U$  test, two-sided.

### Supplementary Figure 5

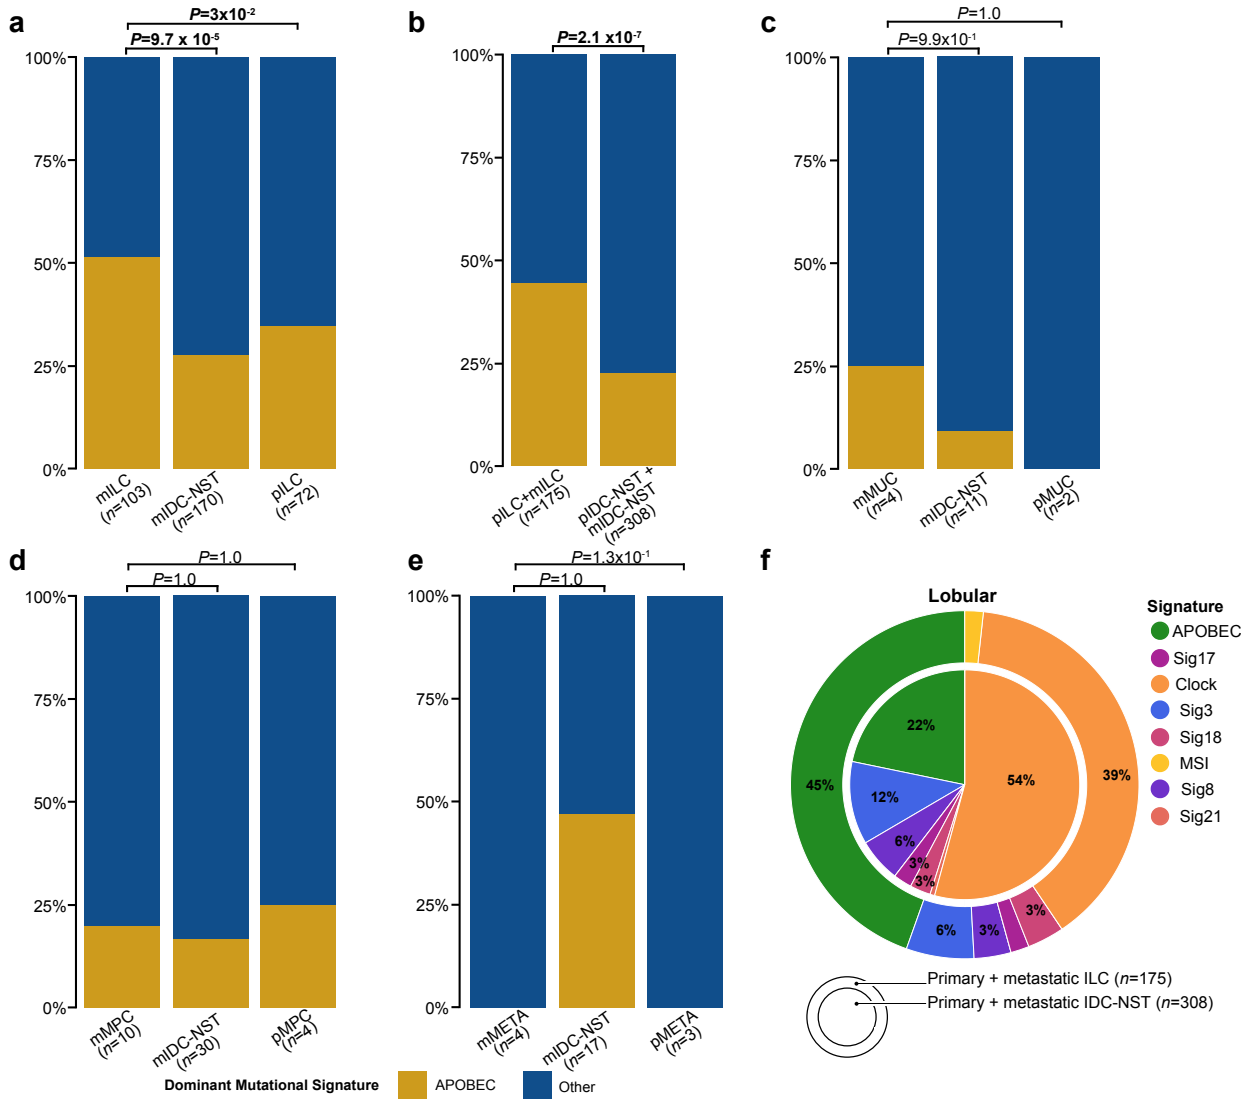

**Supplementary Figure 5. Proportion of primary and metastatic breast cancers of special histologic types with a dominant APOBEC mutational signature, and mutational signatures in primary and metastatic lobular carcinomas.**

Stacked bar plots displaying the proportion of cases with a dominant APOBEC mutational signature in (a) metastatic invasive lobular carcinomas (mILC; n=103), metastatic invasive ductal carcinomas of no special type matched by age, menopausal status and estrogen receptor (ER)/HER2 status (mIDC-NST; n=170), and primary invasive lobular carcinomas (pILC; n=72), (b) in combined primary and metastatic lobular carcinomas (pILC + mILC; n=175) and primary and metastatic invasive ductal carcinomas of no special type matched by clinicopathologic



characteristics and sample type (pIDC-NST + mIDC-NST; n=308), (c) in metastatic mixed mucinous breast cancers (mMUC; n=4), mIDC-NSTs matched by clinicopathologic features (n=11) and primary mixed mucinous breast cancers (pMUC; n=2), (d) in metastatic micropapillary breast cancers (mMPC; n=10), mIDC-NSTs matched by clinicopathologic characteristics (n=30) and primary micropapillary breast cancers (pMPC; n=4), and in (e) metastatic metaplastic breast cancers (mMETA; n=4), mIDC-NSTs matched by clinicopathologic features (n=17) and primary metaplastic breast cancers (pMETA; n=3). Two-tailed fisher's exact test was performed. (f) Proportion of dominant mutational signatures in pILC + mILC (n=175) and pIDC-NST + mIDC-NST (n=308).

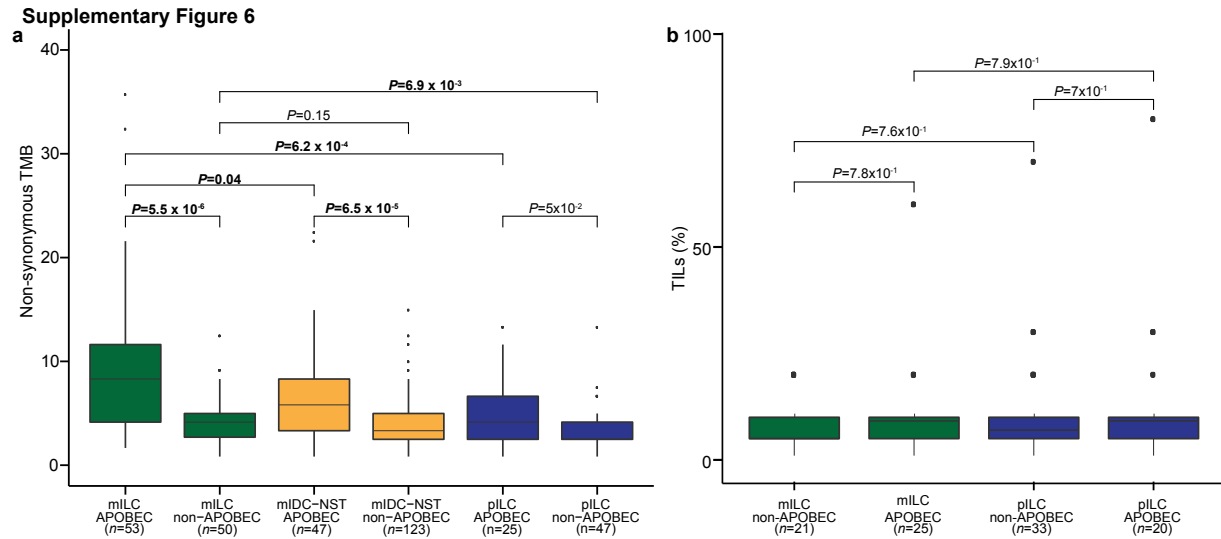

**Supplementary Figure 6. Non-synonymous tumor mutation burden and extent of tumor infiltrating lymphocytes in primary and metastatic lobular carcinomas in relation to a dominant APOBEC mutagenesis signature.**

(a) Boxplots depicting the non-synonymous tumor mutation burden (TMB) in metastatic lobular carcinomas (mILC) displaying a dominant APOBEC (n=53) or a non-APOBEC dominant mutational signature (n=50), age-, menopausal status- and estrogen receptor (ER)/HER2 status-matched metastatic invasive ductal carcinomas of no special type (mIDC-NSTs) with a dominant APOBEC (n=47) or a non-APOBEC mutational signature (n=123) and primary invasive lobular carcinomas (pILC) with a dominant APOBEC (n=25) and a non-APOBEC dominant signature (n=47). (b) Boxplots depicting the extent of infiltration by tumor infiltrating lymphocytes (TILs) in mILCs with a dominant mutational signature other than APOBEC (n=21), mILCs with a dominant APOBEC mutational signature (n=25), pILCs with a dominant mutational signature other than APOBEC (n=33) and pILCs with a dominant APOBEC mutational signature (n=20). Statistically significant  $P$  values ( $P < 0.05$ ) are bolded. Mann-Whitney  $U$  test, two-sided.

**Supplementary Figure 7**

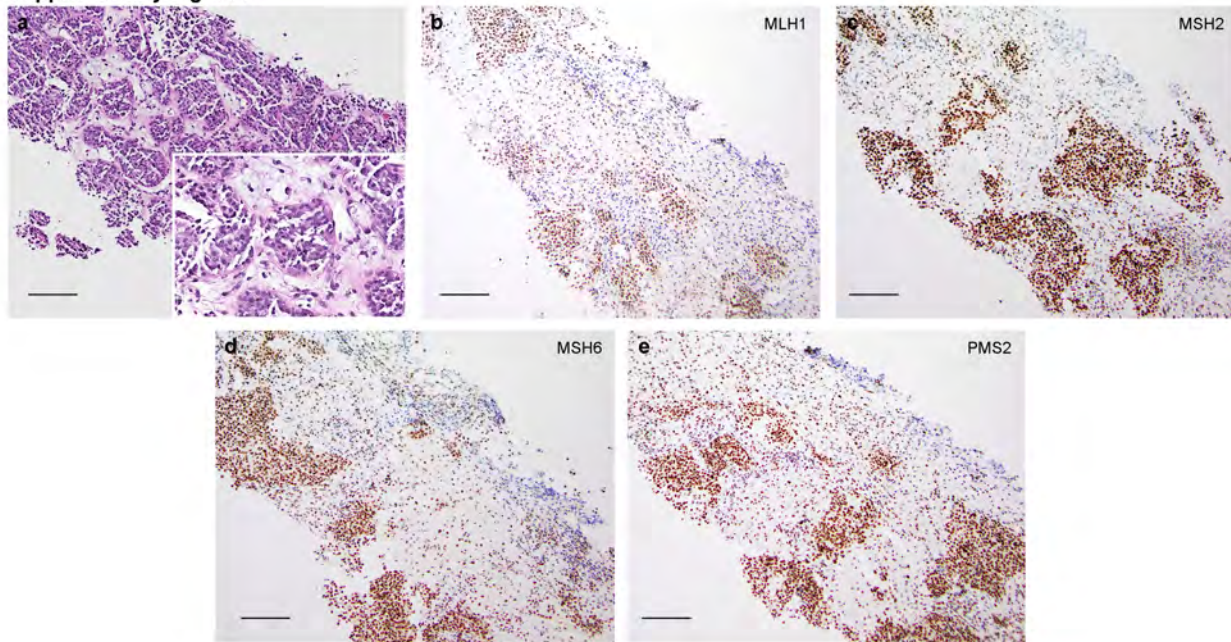

**Supplementary Fig 7: Expression of mismatch repair proteins in a metastatic mixed mucinous carcinoma.** Representative (A) hematoxylin and eosin micrographs, and (B) MLH1, (C) MSH2, (D) MSH6 and (E) PMS2 expression assessed by immunohistochemistry in case MSK-MUC-4. Scale bars, 100  $\mu$ m

**Supplementary Table 1. Estrogen receptor and HER2 status of the breast cancers of special histologic subtype included in this study**

| Estrogen receptor (ER)/ HER2 status | Invasive lobular carcinoma |                    |                                    | Mixed mucinous breast cancer |                  |                                    | Micropapillary breast cancer |                   |                                    | Metaplastic breast cancer |                  |                                    |
|-------------------------------------|----------------------------|--------------------|------------------------------------|------------------------------|------------------|------------------------------------|------------------------------|-------------------|------------------------------------|---------------------------|------------------|------------------------------------|
|                                     | Primary (n=127)            | Metastasis (n=132) | Fisher's exact test <i>P</i> value | Primary (n=14)               | Metastasis (n=5) | Fisher's exact test <i>P</i> value | Primary (n=8)                | Metastasis (n=12) | Fisher's exact test <i>P</i> value | Primary (n=5)             | Metastasis (n=6) | Fisher's exact test <i>P</i> value |
| ER+/HER2-                           | 121 (95.3%)                | 107 (81.1%)        | 0.0016                             | 11 (57.9%)                   | 5 (100%)         | 0.53                               | 5 (62.5%)                    | 9 (75%)           | 0.339                              | 1 (20%)                   | 1 (16.7%)        | 1                                  |
| ER+/HER2+                           | 3 (2.4%)                   | 6 (4.5%)           |                                    | 3 (15.8%)                    | 0 (0%)           |                                    | 2 (25%)                      | 1 (8.3%)          |                                    | 0 (0%)                    | 0 (0%)           |                                    |
| ER-/HER2-                           | 3 (2.4%)                   | 16 (12.1%)         |                                    | 0 (0%)                       | 0 (0%)           |                                    | 0 (0%)                       | 2 (16.7%)         |                                    | 4 (80%)                   | 5 (83.3%)        |                                    |
| ER-/HER2+                           | 0 (0%)                     | 3 (2.3%)           |                                    | 0 (0%)                       | 0 (0%)           |                                    | 1 (12.5%)                    | 0 (0%)            |                                    | 0 (0%)                    | 0 (0%)           |                                    |

**Supplementary Table 2. Clinicopathologic characteristics of the 309 breast cancers of histologic special type in this study and sequencing platform used**

| Sample ID  | Age at diagnosis | Histology                  | Sample type | Estrogen receptor (ER)/HER2 status | MSK-IMPACT Version |
|------------|------------------|----------------------------|-------------|------------------------------------|--------------------|
| MSK-ILC-1  | 52               | Invasive Lobular Carcinoma | Metastasis  | ER+/HER2-                          | MSK-IMPACT-341     |
| MSK-ILC-2  | 79               | Invasive Lobular Carcinoma | Metastasis  | ER+/HER2-                          | MSK-IMPACT-468     |
| MSK-ILC-3  | 54               | Invasive Lobular Carcinoma | Metastasis  | ER+/HER2-                          | MSK-IMPACT-468     |
| MSK-ILC-4  | 38               | Invasive Lobular Carcinoma | Metastasis  | ER+/HER2-                          | MSK-IMPACT-410     |
| MSK-ILC-5  | 58               | Invasive Lobular Carcinoma | Metastasis  | ER+/HER2-                          | MSK-IMPACT-410     |
| MSK-ILC-6  | 46               | Invasive Lobular Carcinoma | Metastasis  | ER+/HER2-                          | MSK-IMPACT-341     |
| MSK-ILC-7  | 62               | Invasive Lobular Carcinoma | Metastasis  | ER+/HER2-                          | MSK-IMPACT-410     |
| MSK-ILC-8  | 45               | Invasive Lobular Carcinoma | Metastasis  | ER+/HER2-                          | MSK-IMPACT-341     |
| MSK-ILC-9  | 51               | Invasive Lobular Carcinoma | Metastasis  | ER-/HER2-                          | MSK-IMPACT-341     |
| MSK-ILC-10 | 38               | Invasive Lobular Carcinoma | Metastasis  | ER+/HER2+                          | MSK-IMPACT-410     |
| MSK-ILC-11 | 38               | Invasive Lobular Carcinoma | Metastasis  | ER+/HER2-                          | MSK-IMPACT-410     |
| MSK-ILC-12 | 65               | Invasive Lobular Carcinoma | Metastasis  | ER-/HER2-                          | MSK-IMPACT-410     |
| MSK-ILC-13 | 66               | Invasive Lobular Carcinoma | Primary     | ER+/HER2-                          | MSK-IMPACT-410     |
| MSK-ILC-14 | 47               | Invasive Lobular Carcinoma | Primary     | ER+/HER2-                          | MSK-IMPACT-468     |
| MSK-ILC-15 | 63               | Invasive Lobular Carcinoma | Metastasis  | ER+/HER2-                          | MSK-IMPACT-468     |
| MSK-ILC-16 | 59               | Invasive Lobular Carcinoma | Primary     | ER+/HER2-                          | MSK-IMPACT-468     |
| MSK-ILC-17 | 42               | Invasive Lobular Carcinoma | Metastasis  | ER+/HER2-                          | MSK-IMPACT-410     |
| MSK-ILC-18 | 47               | Invasive Lobular Carcinoma | Metastasis  | ER+/HER2-                          | MSK-IMPACT-341     |
| MSK-ILC-19 | 31               | Invasive Lobular Carcinoma | Metastasis  | ER+/HER2-                          | MSK-IMPACT-410     |
| MSK-ILC-20 | 60               | Invasive Lobular Carcinoma | Metastasis  | ER+/HER2-                          | MSK-IMPACT-410     |
| MSK-ILC-21 | 66               | Invasive Lobular Carcinoma | Primary     | ER+/HER2-                          | MSK-IMPACT-468     |
| MSK-ILC-22 | 43               | Invasive Lobular Carcinoma | Metastasis  | ER-/HER2-                          | MSK-IMPACT-468     |
| MSK-ILC-23 | 64               | Invasive Lobular Carcinoma | Metastasis  | ER+/HER2-                          | MSK-IMPACT-410     |
| MSK-ILC-24 | 46               | Invasive Lobular Carcinoma | Metastasis  | ER+/HER2-                          | MSK-IMPACT-341     |
| MSK-ILC-25 | 58               | Invasive Lobular Carcinoma | Metastasis  | ER+/HER2-                          | MSK-IMPACT-410     |
| MSK-ILC-26 | 55               | Invasive Lobular Carcinoma | Primary     | ER+/HER2-                          | MSK-IMPACT-468     |
| MSK-ILC-27 | 34               | Invasive Lobular Carcinoma | Metastasis  | ER+/HER2-                          | MSK-IMPACT-341     |
| MSK-ILC-28 | 47               | Invasive Lobular Carcinoma | Metastasis  | ER+/HER2-                          | MSK-IMPACT-341     |
| MSK-ILC-29 | 76               | Invasive Lobular Carcinoma | Primary     | ER+/HER2-                          | MSK-IMPACT-468     |
| MSK-ILC-30 | 66               | Invasive Lobular Carcinoma | Metastasis  | ER+/HER2-                          | MSK-IMPACT-410     |
| MSK-ILC-31 | 78               | Invasive Lobular Carcinoma | Primary     | ER+/HER2-                          | MSK-IMPACT-410     |
| MSK-ILC-32 | 52               | Invasive Lobular Carcinoma | Metastasis  | ER+/HER2-                          | MSK-IMPACT-410     |
| MSK-ILC-33 | 69               | Invasive Lobular Carcinoma | Primary     | ER+/HER2-                          | MSK-IMPACT-468     |
| MSK-ILC-34 | 50               | Invasive Lobular Carcinoma | Primary     | ER+/HER2-                          | MSK-IMPACT-468     |
| MSK-ILC-35 | 66               | Invasive Lobular Carcinoma | Primary     | ER+/HER2-                          | MSK-IMPACT-410     |
| MSK-ILC-36 | 76               | Invasive Lobular Carcinoma | Primary     | ER+/HER2-                          | MSK-IMPACT-468     |
| MSK-ILC-37 | 36               | Invasive Lobular Carcinoma | Metastasis  | ER-/HER2+                          | MSK-IMPACT-341     |
| MSK-ILC-38 | 72               | Invasive Lobular Carcinoma | Metastasis  | ER+/HER2-                          | MSK-IMPACT-341     |
| MSK-ILC-39 | 42               | Invasive Lobular Carcinoma | Metastasis  | ER-/HER2-                          | MSK-IMPACT-341     |
| MSK-ILC-40 | 55               | Invasive Lobular Carcinoma | Metastasis  | ER+/HER2+                          | MSK-IMPACT-410     |
| MSK-ILC-41 | 46               | Invasive Lobular Carcinoma | Metastasis  | ER+/HER2-                          | MSK-IMPACT-410     |
| MSK-ILC-42 | 60               | Invasive Lobular Carcinoma | Metastasis  | ER+/HER2-                          | MSK-IMPACT-341     |
| MSK-ILC-43 | 60               | Invasive Lobular Carcinoma | Metastasis  | ER+/HER2-                          | MSK-IMPACT-341     |
| MSK-ILC-44 | 53               | Invasive Lobular Carcinoma | Metastasis  | ER+/HER2-                          | MSK-IMPACT-410     |
| MSK-ILC-45 | 57               | Invasive Lobular Carcinoma | Primary     | ER+/HER2-                          | MSK-IMPACT-341     |
| MSK-ILC-46 | 52               | Invasive Lobular Carcinoma | Primary     | ER+/HER2-                          | MSK-IMPACT-410     |
| MSK-ILC-47 | 55               | Invasive Lobular Carcinoma | Metastasis  | ER+/HER2-                          | MSK-IMPACT-341     |
| MSK-ILC-48 | 47               | Invasive Lobular Carcinoma | Metastasis  | ER+/HER2-                          | MSK-IMPACT-410     |
| MSK-ILC-49 | 60               | Invasive Lobular Carcinoma | Metastasis  | ER+/HER2-                          | MSK-IMPACT-410     |
| MSK-ILC-50 | 54               | Invasive Lobular Carcinoma | Metastasis  | ER+/HER2-                          | MSK-IMPACT-410     |
| MSK-ILC-51 | 41               | Invasive Lobular Carcinoma | Metastasis  | ER+/HER2-                          | MSK-IMPACT-410     |
| MSK-ILC-52 | 60               | Invasive Lobular Carcinoma | Metastasis  | ER+/HER2-                          | MSK-IMPACT-410     |
| MSK-ILC-53 | 41               | Invasive Lobular Carcinoma | Metastasis  | ER-/HER2-                          | MSK-IMPACT-410     |
| MSK-ILC-54 | 76               | Invasive Lobular Carcinoma | Metastasis  | ER+/HER2-                          | MSK-IMPACT-410     |
| MSK-ILC-55 | 50               | Invasive Lobular Carcinoma | Metastasis  | ER+/HER2-                          | MSK-IMPACT-410     |

|             |    |                            |            |           |                |
|-------------|----|----------------------------|------------|-----------|----------------|
| MSK-ILC-56  | 62 | Invasive Lobular Carcinoma | Primary    | ER+/HER2- | MSK-IMPACT-410 |
| MSK-ILC-57  | 53 | Invasive Lobular Carcinoma | Metastasis | ER-/HER2+ | MSK-IMPACT-410 |
| MSK-ILC-58  | 54 | Invasive Lobular Carcinoma | Primary    | ER+/HER2- | MSK-IMPACT-410 |
| MSK-ILC-59  | 44 | Invasive Lobular Carcinoma | Metastasis | ER+/HER2- | MSK-IMPACT-410 |
| MSK-ILC-60  | 76 | Invasive Lobular Carcinoma | Primary    | ER+/HER2- | MSK-IMPACT-341 |
| MSK-ILC-61  | 67 | Invasive Lobular Carcinoma | Primary    | ER+/HER2+ | MSK-IMPACT-468 |
| MSK-ILC-62  | 47 | Invasive Lobular Carcinoma | Metastasis | ER+/HER2- | MSK-IMPACT-410 |
| MSK-ILC-63  | 53 | Invasive Lobular Carcinoma | Metastasis | ER+/HER2- | MSK-IMPACT-341 |
| MSK-ILC-64  | 58 | Invasive Lobular Carcinoma | Metastasis | ER-/HER2- | MSK-IMPACT-410 |
| MSK-ILC-65  | 46 | Invasive Lobular Carcinoma | Metastasis | ER+/HER2- | MSK-IMPACT-410 |
| MSK-ILC-66  | 56 | Invasive Lobular Carcinoma | Metastasis | ER+/HER2- | MSK-IMPACT-410 |
| MSK-ILC-67  | 50 | Invasive Lobular Carcinoma | Metastasis | ER+/HER2- | MSK-IMPACT-410 |
| MSK-ILC-68  | 71 | Invasive Lobular Carcinoma | Metastasis | ER+/HER2- | MSK-IMPACT-341 |
| MSK-ILC-69  | 71 | Invasive Lobular Carcinoma | Primary    | ER+/HER2- | MSK-IMPACT-341 |
| MSK-ILC-70  | 60 | Invasive Lobular Carcinoma | Primary    | ER+/HER2+ | MSK-IMPACT-410 |
| MSK-ILC-71  | 42 | Invasive Lobular Carcinoma | Primary    | ER+/HER2- | MSK-IMPACT-341 |
| MSK-ILC-72  | 54 | Invasive Lobular Carcinoma | Metastasis | ER+/HER2- | MSK-IMPACT-341 |
| MSK-ILC-73  | 54 | Invasive Lobular Carcinoma | Metastasis | ER+/HER2- | MSK-IMPACT-410 |
| MSK-ILC-74  | 51 | Invasive Lobular Carcinoma | Metastasis | ER+/HER2- | MSK-IMPACT-341 |
| MSK-ILC-75  | 62 | Invasive Lobular Carcinoma | Metastasis | ER+/HER2- | MSK-IMPACT-410 |
| MSK-ILC-76  | 43 | Invasive Lobular Carcinoma | Metastasis | ER+/HER2- | MSK-IMPACT-410 |
| MSK-ILC-77  | 66 | Invasive Lobular Carcinoma | Metastasis | ER+/HER2- | MSK-IMPACT-341 |
| MSK-ILC-78  | 57 | Invasive Lobular Carcinoma | Primary    | ER+/HER2- | MSK-IMPACT-410 |
| MSK-ILC-79  | 42 | Invasive Lobular Carcinoma | Primary    | ER+/HER2- | MSK-IMPACT-341 |
| MSK-ILC-80  | 50 | Invasive Lobular Carcinoma | Metastasis | ER+/HER2- | MSK-IMPACT-468 |
| MSK-ILC-81  | 43 | Invasive Lobular Carcinoma | Primary    | ER+/HER2- | MSK-IMPACT-410 |
| MSK-ILC-82  | 66 | Invasive Lobular Carcinoma | Metastasis | ER+/HER2- | MSK-IMPACT-341 |
| MSK-ILC-83  | 53 | Invasive Lobular Carcinoma | Primary    | ER+/HER2- | MSK-IMPACT-410 |
| MSK-ILC-84  | 55 | Invasive Lobular Carcinoma | Metastasis | ER+/HER2- | MSK-IMPACT-341 |
| MSK-ILC-85  | 58 | Invasive Lobular Carcinoma | Metastasis | ER+/HER2- | MSK-IMPACT-410 |
| MSK-ILC-86  | 48 | Invasive Lobular Carcinoma | Metastasis | ER-/HER2+ | MSK-IMPACT-341 |
| MSK-ILC-87  | 51 | Invasive Lobular Carcinoma | Metastasis | ER+/HER2+ | MSK-IMPACT-341 |
| MSK-ILC-88  | 45 | Invasive Lobular Carcinoma | Primary    | ER+/HER2- | MSK-IMPACT-410 |
| MSK-ILC-89  | 62 | Invasive Lobular Carcinoma | Primary    | ER+/HER2- | MSK-IMPACT-341 |
| MSK-ILC-90  | 48 | Invasive Lobular Carcinoma | Primary    | ER+/HER2- | MSK-IMPACT-341 |
| MSK-ILC-91  | 40 | Invasive Lobular Carcinoma | Metastasis | ER+/HER2- | MSK-IMPACT-410 |
| MSK-ILC-92  | 61 | Invasive Lobular Carcinoma | Primary    | ER+/HER2- | MSK-IMPACT-341 |
| MSK-ILC-93  | 55 | Invasive Lobular Carcinoma | Primary    | ER+/HER2- | MSK-IMPACT-341 |
| MSK-ILC-94  | 55 | Invasive Lobular Carcinoma | Metastasis | ER+/HER2- | MSK-IMPACT-410 |
| MSK-ILC-95  | 48 | Invasive Lobular Carcinoma | Primary    | ER+/HER2- | MSK-IMPACT-341 |
| MSK-ILC-96  | 48 | Invasive Lobular Carcinoma | Metastasis | ER-/HER2- | MSK-IMPACT-410 |
| MSK-ILC-97  | 46 | Invasive Lobular Carcinoma | Metastasis | ER-/HER2- | MSK-IMPACT-410 |
| MSK-ILC-98  | 52 | Invasive Lobular Carcinoma | Metastasis | ER+/HER2- | MSK-IMPACT-341 |
| MSK-ILC-99  | 54 | Invasive Lobular Carcinoma | Metastasis | ER+/HER2- | MSK-IMPACT-410 |
| MSK-ILC-100 | 54 | Invasive Lobular Carcinoma | Metastasis | ER-/HER2- | MSK-IMPACT-410 |
| MSK-ILC-101 | 58 | Invasive Lobular Carcinoma | Metastasis | ER+/HER2- | MSK-IMPACT-410 |
| MSK-ILC-102 | 56 | Invasive Lobular Carcinoma | Metastasis | ER+/HER2- | MSK-IMPACT-410 |
| MSK-ILC-103 | 44 | Invasive Lobular Carcinoma | Metastasis | ER+/HER2- | MSK-IMPACT-341 |
| MSK-ILC-104 | 63 | Invasive Lobular Carcinoma | Metastasis | ER+/HER2- | MSK-IMPACT-341 |
| MSK-ILC-105 | 73 | Invasive Lobular Carcinoma | Metastasis | ER+/HER2- | MSK-IMPACT-341 |
| MSK-ILC-106 | 35 | Invasive Lobular Carcinoma | Metastasis | ER-/HER2- | MSK-IMPACT-410 |
| MSK-ILC-107 | 47 | Invasive Lobular Carcinoma | Primary    | ER+/HER2- | MSK-IMPACT-410 |
| MSK-ILC-108 | 39 | Invasive Lobular Carcinoma | Metastasis | ER+/HER2- | MSK-IMPACT-410 |
| MSK-ILC-109 | 29 | Invasive Lobular Carcinoma | Primary    | ER+/HER2- | MSK-IMPACT-341 |
| MSK-ILC-110 | 69 | Invasive Lobular Carcinoma | Metastasis | ER+/HER2+ | MSK-IMPACT-410 |
| MSK-ILC-111 | 45 | Invasive Lobular Carcinoma | Primary    | ER+/HER2- | MSK-IMPACT-468 |
| MSK-ILC-112 | 56 | Invasive Lobular Carcinoma | Primary    | ER+/HER2- | MSK-IMPACT-410 |
| MSK-ILC-113 | 50 | Invasive Lobular Carcinoma | Metastasis | ER+/HER2- | MSK-IMPACT-410 |
| MSK-ILC-114 | 44 | Invasive Lobular Carcinoma | Metastasis | ER+/HER2- | MSK-IMPACT-341 |
| MSK-ILC-115 | 49 | Invasive Lobular Carcinoma | Primary    | ER+/HER2- | MSK-IMPACT-341 |

|             |    |                            |            |           |                |
|-------------|----|----------------------------|------------|-----------|----------------|
| MSK-ILC-116 | 53 | Invasive Lobular Carcinoma | Metastasis | ER+/HER2- | MSK-IMPACT-341 |
| MSK-ILC-117 | 73 | Invasive Lobular Carcinoma | Metastasis | ER+/HER2+ | MSK-IMPACT-410 |
| MSK-ILC-118 | 73 | Invasive Lobular Carcinoma | Metastasis | ER+/HER2- | MSK-IMPACT-468 |
| MSK-ILC-119 | 43 | Invasive Lobular Carcinoma | Metastasis | ER+/HER2- | MSK-IMPACT-410 |
| MSK-ILC-120 | 50 | Invasive Lobular Carcinoma | Metastasis | ER+/HER2- | MSK-IMPACT-341 |
| MSK-ILC-121 | 55 | Invasive Lobular Carcinoma | Primary    | ER+/HER2+ | MSK-IMPACT-341 |
| MSK-ILC-122 | 63 | Invasive Lobular Carcinoma | Primary    | ER+/HER2- | MSK-IMPACT-341 |
| MSK-ILC-123 | 50 | Invasive Lobular Carcinoma | Metastasis | ER+/HER2- | MSK-IMPACT-341 |
| MSK-ILC-124 | 50 | Invasive Lobular Carcinoma | Metastasis | ER+/HER2- | MSK-IMPACT-468 |
| MSK-ILC-125 | 47 | Invasive Lobular Carcinoma | Metastasis | ER+/HER2+ | MSK-IMPACT-341 |
| MSK-ILC-126 | 38 | Invasive Lobular Carcinoma | Metastasis | ER+/HER2- | MSK-IMPACT-410 |
| MSK-ILC-127 | 65 | Invasive Lobular Carcinoma | Metastasis | ER+/HER2- | MSK-IMPACT-341 |
| MSK-ILC-128 | 54 | Invasive Lobular Carcinoma | Metastasis | ER+/HER2- | MSK-IMPACT-341 |
| MSK-ILC-129 | 49 | Invasive Lobular Carcinoma | Primary    | ER+/HER2- | MSK-IMPACT-410 |
| MSK-ILC-130 | 58 | Invasive Lobular Carcinoma | Primary    | ER+/HER2- | MSK-IMPACT-341 |
| MSK-ILC-131 | 50 | Invasive Lobular Carcinoma | Metastasis | ER+/HER2- | MSK-IMPACT-341 |
| MSK-ILC-132 | 50 | Invasive Lobular Carcinoma | Metastasis | ER+/HER2- | MSK-IMPACT-410 |
| MSK-ILC-133 | 48 | Invasive Lobular Carcinoma | Metastasis | ER+/HER2- | MSK-IMPACT-341 |
| MSK-ILC-134 | 41 | Invasive Lobular Carcinoma | Metastasis | ER+/HER2- | MSK-IMPACT-341 |
| MSK-ILC-135 | 58 | Invasive Lobular Carcinoma | Primary    | ER+/HER2- | MSK-IMPACT-341 |
| MSK-ILC-136 | 58 | Invasive Lobular Carcinoma | Metastasis | ER+/HER2- | MSK-IMPACT-410 |
| MSK-ILC-137 | 46 | Invasive Lobular Carcinoma | Metastasis | ER+/HER2- | MSK-IMPACT-468 |
| MSK-ILC-138 | 56 | Invasive Lobular Carcinoma | Metastasis | ER+/HER2- | MSK-IMPACT-341 |
| MSK-ILC-139 | 53 | Invasive Lobular Carcinoma | Primary    | ER+/HER2- | MSK-IMPACT-341 |
| MSK-ILC-140 | 53 | Invasive Lobular Carcinoma | Primary    | ER+/HER2- | MSK-IMPACT-341 |
| MSK-ILC-141 | 45 | Invasive Lobular Carcinoma | Primary    | ER+/HER2- | MSK-IMPACT-341 |
| MSK-ILC-142 | 67 | Invasive Lobular Carcinoma | Primary    | ER+/HER2- | MSK-IMPACT-410 |
| MSK-ILC-143 | 50 | Invasive Lobular Carcinoma | Metastasis | ER-/HER2- | MSK-IMPACT-410 |
| MSK-ILC-144 | 65 | Invasive Lobular Carcinoma | Metastasis | ER-/HER2- | MSK-IMPACT-410 |
| MSK-ILC-145 | 62 | Invasive Lobular Carcinoma | Primary    | ER-/HER2- | MSK-IMPACT-410 |
| MSK-ILC-146 | 41 | Invasive Lobular Carcinoma | Metastasis | ER+/HER2- | MSK-IMPACT-410 |
| MSK-ILC-147 | 40 | Invasive Lobular Carcinoma | Metastasis | ER+/HER2- | MSK-IMPACT-410 |
| MSK-ILC-148 | 71 | Invasive Lobular Carcinoma | Metastasis | ER+/HER2- | MSK-IMPACT-410 |
| MSK-ILC-149 | 60 | Invasive Lobular Carcinoma | Metastasis | ER+/HER2- | MSK-IMPACT-410 |
| MSK-ILC-150 | 39 | Invasive Lobular Carcinoma | Metastasis | ER+/HER2- | MSK-IMPACT-410 |
| MSK-ILC-151 | 58 | Invasive Lobular Carcinoma | Primary    | ER+/HER2- | MSK-IMPACT-410 |
| MSK-ILC-152 | 53 | Invasive Lobular Carcinoma | Primary    | ER+/HER2- | MSK-IMPACT-410 |
| MSK-ILC-153 | 71 | Invasive Lobular Carcinoma | Primary    | ER+/HER2- | MSK-IMPACT-410 |
| MSK-ILC-154 | 49 | Invasive Lobular Carcinoma | Metastasis | ER-/HER2- | MSK-IMPACT-410 |
| MSK-ILC-155 | 50 | Invasive Lobular Carcinoma | Primary    | ER+/HER2- | MSK-IMPACT-410 |
| MSK-ILC-156 | 56 | Invasive Lobular Carcinoma | Primary    | ER+/HER2- | MSK-IMPACT-410 |
| MSK-ILC-157 | 57 | Invasive Lobular Carcinoma | Metastasis | ER+/HER2- | MSK-IMPACT-410 |
| MSK-ILC-158 | 50 | Invasive Lobular Carcinoma | Primary    | ER+/HER2- | MSK-IMPACT-410 |
| MSK-ILC-159 | 43 | Invasive Lobular Carcinoma | Metastasis | ER+/HER2- | MSK-IMPACT-410 |
| MSK-ILC-160 | 63 | Invasive Lobular Carcinoma | Primary    | ER+/HER2- | MSK-IMPACT-410 |
| MSK-ILC-161 | 45 | Invasive Lobular Carcinoma | Primary    | ER+/HER2- | MSK-IMPACT-468 |
| MSK-ILC-162 | 49 | Invasive Lobular Carcinoma | Metastasis | ER+/HER2- | MSK-IMPACT-410 |
| MSK-ILC-163 | 67 | Invasive Lobular Carcinoma | Metastasis | ER-/HER2- | MSK-IMPACT-410 |
| MSK-ILC-164 | 48 | Invasive Lobular Carcinoma | Metastasis | ER+/HER2- | MSK-IMPACT-410 |
| MSK-ILC-165 | 54 | Invasive Lobular Carcinoma | Metastasis | ER+/HER2- | MSK-IMPACT-410 |
| MSK-ILC-166 | 55 | Invasive Lobular Carcinoma | Metastasis | ER+/HER2- | MSK-IMPACT-410 |
| MSK-ILC-167 | 79 | Invasive Lobular Carcinoma | Primary    | ER+/HER2- | MSK-IMPACT-410 |
| MSK-ILC-168 | 79 | Invasive Lobular Carcinoma | Primary    | ER+/HER2- | MSK-IMPACT-410 |
| MSK-ILC-169 | 56 | Invasive Lobular Carcinoma | Metastasis | ER+/HER2- | MSK-IMPACT-410 |
| MSK-ILC-170 | 58 | Invasive Lobular Carcinoma | Primary    | ER+/HER2- | MSK-IMPACT-410 |
| MSK-ILC-171 | 54 | Invasive Lobular Carcinoma | Primary    | ER+/HER2- | MSK-IMPACT-468 |
| MSK-ILC-172 | 47 | Invasive Lobular Carcinoma | Metastasis | ER+/HER2- | MSK-IMPACT-410 |
| MSK-ILC-173 | 50 | Invasive Lobular Carcinoma | Primary    | ER+/HER2- | MSK-IMPACT-410 |
| MSK-ILC-174 | 44 | Invasive Lobular Carcinoma | Metastasis | ER+/HER2- | MSK-IMPACT-410 |
| MSK-ILC-175 | 39 | Invasive Lobular Carcinoma | Primary    | ER+/HER2- | MSK-IMPACT-468 |

Supplementary Table 2

Page 4

|             |    |                            |            |           |                |
|-------------|----|----------------------------|------------|-----------|----------------|
| MSK-ILC-176 | 64 | Invasive Lobular Carcinoma | Primary    | ER+/HER2- | MSK-IMPACT-468 |
| MSK-ILC-177 | 54 | Invasive Lobular Carcinoma | Primary    | ER+/HER2- | MSK-IMPACT-468 |
| MSK-ILC-178 | 47 | Invasive Lobular Carcinoma | Metastasis | ER+/HER2- | MSK-IMPACT-410 |
| MSK-ILC-179 | 45 | Invasive Lobular Carcinoma | Primary    | ER+/HER2- | MSK-IMPACT-468 |
| MSK-ILC-180 | 65 | Invasive Lobular Carcinoma | Primary    | ER+/HER2- | MSK-IMPACT-410 |
| MSK-ILC-181 | 39 | Invasive Lobular Carcinoma | Primary    | ER+/HER2- | MSK-IMPACT-410 |
| MSK-ILC-182 | 66 | Invasive Lobular Carcinoma | Primary    | ER+/HER2- | MSK-IMPACT-468 |
| MSK-ILC-183 | 68 | Invasive Lobular Carcinoma | Metastasis | ER+/HER2- | MSK-IMPACT-410 |
| MSK-ILC-184 | 57 | Invasive Lobular Carcinoma | Primary    | ER+/HER2- | MSK-IMPACT-410 |
| MSK-ILC-185 | 51 | Invasive Lobular Carcinoma | Metastasis | ER-/HER2- | MSK-IMPACT-410 |
| MSK-ILC-186 | 71 | Invasive Lobular Carcinoma | Primary    | ER+/HER2- | MSK-IMPACT-410 |
| MSK-ILC-187 | 55 | Invasive Lobular Carcinoma | Metastasis | ER+/HER2- | MSK-IMPACT-410 |
| MSK-ILC-188 | 53 | Invasive Lobular Carcinoma | Primary    | ER+/HER2- | MSK-IMPACT-410 |
| MSK-ILC-189 | 77 | Invasive Lobular Carcinoma | Primary    | ER+/HER2- | MSK-IMPACT-410 |
| MSK-ILC-190 | 73 | Invasive Lobular Carcinoma | Primary    | ER-/HER2- | MSK-IMPACT-410 |
| MSK-ILC-191 | 51 | Invasive Lobular Carcinoma | Metastasis | ER+/HER2- | MSK-IMPACT-410 |
| MSK-ILC-192 | 41 | Invasive Lobular Carcinoma | Metastasis | ER+/HER2- | MSK-IMPACT-410 |
| MSK-ILC-193 | 38 | Invasive Lobular Carcinoma | Primary    | ER+/HER2- | MSK-IMPACT-468 |
| MSK-ILC-194 | 74 | Invasive Lobular Carcinoma | Primary    | ER+/HER2- | MSK-IMPACT-468 |
| MSK-ILC-195 | 57 | Invasive Lobular Carcinoma | Primary    | ER+/HER2- | MSK-IMPACT-410 |
| MSK-ILC-196 | 52 | Invasive Lobular Carcinoma | Primary    | ER+/HER2- | MSK-IMPACT-410 |
| MSK-ILC-197 | 78 | Invasive Lobular Carcinoma | Primary    | ER+/HER2- | MSK-IMPACT-468 |
| MSK-ILC-198 | 57 | Invasive Lobular Carcinoma | Primary    | ER+/HER2- | MSK-IMPACT-468 |
| MSK-ILC-199 | 64 | Invasive Lobular Carcinoma | Primary    | ER+/HER2- | MSK-IMPACT-468 |
| MSK-ILC-200 | 60 | Invasive Lobular Carcinoma | Primary    | ER+/HER2- | MSK-IMPACT-468 |
| MSK-ILC-201 | 72 | Invasive Lobular Carcinoma | Primary    | ER+/HER2- | MSK-IMPACT-468 |
| MSK-ILC-202 | 51 | Invasive Lobular Carcinoma | Primary    | ER+/HER2- | MSK-IMPACT-468 |
| MSK-ILC-203 | 78 | Invasive Lobular Carcinoma | Primary    | ER-/HER2- | MSK-IMPACT-468 |
| MSK-ILC-204 | 45 | Invasive Lobular Carcinoma | Primary    | ER+/HER2- | MSK-IMPACT-410 |
| MSK-ILC-205 | 49 | Invasive Lobular Carcinoma | Primary    | ER+/HER2- | MSK-IMPACT-410 |
| MSK-ILC-206 | 59 | Invasive Lobular Carcinoma | Primary    | ER+/HER2- | MSK-IMPACT-410 |
| MSK-ILC-207 | 55 | Invasive Lobular Carcinoma | Metastasis | ER+/HER2- | MSK-IMPACT-410 |
| MSK-ILC-208 | 57 | Invasive Lobular Carcinoma | Primary    | ER+/HER2- | MSK-IMPACT-410 |
| MSK-ILC-209 | 52 | Invasive Lobular Carcinoma | Primary    | ER+/HER2- | MSK-IMPACT-468 |
| MSK-ILC-210 | 45 | Invasive Lobular Carcinoma | Primary    | ER+/HER2- | MSK-IMPACT-468 |
| MSK-ILC-211 | 54 | Invasive Lobular Carcinoma | Metastasis | ER+/HER2- | MSK-IMPACT-468 |
| MSK-ILC-212 | 46 | Invasive Lobular Carcinoma | Metastasis | ER+/HER2- | MSK-IMPACT-410 |
| MSK-ILC-213 | 72 | Invasive Lobular Carcinoma | Primary    | ER+/HER2- | MSK-IMPACT-468 |
| MSK-ILC-214 | 41 | Invasive Lobular Carcinoma | Primary    | ER+/HER2- | MSK-IMPACT-410 |
| MSK-ILC-215 | 48 | Invasive Lobular Carcinoma | Primary    | ER+/HER2- | MSK-IMPACT-410 |
| MSK-ILC-216 | 35 | Invasive Lobular Carcinoma | Primary    | ER+/HER2- | MSK-IMPACT-410 |
| MSK-ILC-217 | 58 | Invasive Lobular Carcinoma | Metastasis | ER+/HER2- | MSK-IMPACT-410 |
| MSK-ILC-218 | 47 | Invasive Lobular Carcinoma | Primary    | ER+/HER2- | MSK-IMPACT-410 |
| MSK-ILC-219 | 49 | Invasive Lobular Carcinoma | Primary    | ER+/HER2- | MSK-IMPACT-468 |
| MSK-ILC-220 | 76 | Invasive Lobular Carcinoma | Primary    | ER+/HER2- | MSK-IMPACT-410 |
| MSK-ILC-221 | 70 | Invasive Lobular Carcinoma | Primary    | ER+/HER2- | MSK-IMPACT-468 |
| MSK-ILC-222 | 41 | Invasive Lobular Carcinoma | Primary    | ER+/HER2- | MSK-IMPACT-468 |
| MSK-ILC-223 | 62 | Invasive Lobular Carcinoma | Primary    | ER+/HER2- | MSK-IMPACT-468 |
| MSK-ILC-224 | 48 | Invasive Lobular Carcinoma | Primary    | ER+/HER2- | MSK-IMPACT-468 |
| MSK-ILC-225 | 55 | Invasive Lobular Carcinoma | Primary    | ER+/HER2- | MSK-IMPACT-468 |
| MSK-ILC-226 | 36 | Invasive Lobular Carcinoma | Metastasis | ER+/HER2- | MSK-IMPACT-468 |
| MSK-ILC-227 | 62 | Invasive Lobular Carcinoma | Primary    | ER+/HER2- | MSK-IMPACT-468 |
| MSK-ILC-228 | 63 | Invasive Lobular Carcinoma | Metastasis | ER+/HER2- | MSK-IMPACT-468 |
| MSK-ILC-229 | 71 | Invasive Lobular Carcinoma | Metastasis | ER+/HER2- | MSK-IMPACT-468 |
| MSK-ILC-230 | 49 | Invasive Lobular Carcinoma | Metastasis | ER-/HER2- | MSK-IMPACT-468 |
| MSK-ILC-231 | 65 | Invasive Lobular Carcinoma | Primary    | ER+/HER2- | MSK-IMPACT-468 |
| MSK-ILC-232 | 59 | Invasive Lobular Carcinoma | Primary    | ER+/HER2- | MSK-IMPACT-468 |
| MSK-ILC-233 | 53 | Invasive Lobular Carcinoma | Primary    | ER+/HER2- | MSK-IMPACT-468 |
| MSK-ILC-234 | 53 | Invasive Lobular Carcinoma | Primary    | ER+/HER2- | MSK-IMPACT-468 |
| MSK-ILC-235 | 47 | Invasive Lobular Carcinoma | Primary    | ER+/HER2- | MSK-IMPACT-468 |



|             |    |                            |            |           |                |
|-------------|----|----------------------------|------------|-----------|----------------|
| MSK-ILC-236 | 49 | Invasive Lobular Carcinoma | Primary    | ER+/HER2- | MSK-IMPACT-468 |
| MSK-ILC-237 | 71 | Invasive Lobular Carcinoma | Primary    | ER+/HER2- | MSK-IMPACT-468 |
| MSK-ILC-238 | 72 | Invasive Lobular Carcinoma | Metastasis | ER+/HER2- | MSK-IMPACT-468 |
| MSK-ILC-239 | 54 | Invasive Lobular Carcinoma | Primary    | ER+/HER2- | MSK-IMPACT-468 |
| MSK-ILC-240 | 38 | Invasive Lobular Carcinoma | Primary    | ER+/HER2- | MSK-IMPACT-468 |
| MSK-ILC-241 | 48 | Invasive Lobular Carcinoma | Primary    | ER+/HER2- | MSK-IMPACT-468 |
| MSK-ILC-242 | 69 | Invasive Lobular Carcinoma | Primary    | ER+/HER2- | MSK-IMPACT-468 |
| MSK-ILC-243 | 64 | Invasive Lobular Carcinoma | Primary    | ER+/HER2- | MSK-IMPACT-468 |
| MSK-ILC-244 | 49 | Invasive Lobular Carcinoma | Metastasis | ER+/HER2- | MSK-IMPACT-468 |
| MSK-ILC-245 | 74 | Invasive Lobular Carcinoma | Primary    | ER+/HER2- | MSK-IMPACT-468 |
| MSK-ILC-246 | 67 | Invasive Lobular Carcinoma | Primary    | ER+/HER2- | MSK-IMPACT-468 |
| MSK-ILC-247 | 58 | Invasive Lobular Carcinoma | Primary    | ER+/HER2- | MSK-IMPACT-468 |
| MSK-ILC-248 | 63 | Invasive Lobular Carcinoma | Primary    | ER+/HER2- | MSK-IMPACT-468 |
| MSK-ILC-249 | 49 | Invasive Lobular Carcinoma | Primary    | ER+/HER2- | MSK-IMPACT-468 |
| MSK-ILC-250 | 49 | Invasive Lobular Carcinoma | Primary    | ER+/HER2- | MSK-IMPACT-468 |
| MSK-ILC-251 | 57 | Invasive Lobular Carcinoma | Primary    | ER+/HER2- | MSK-IMPACT-468 |
| MSK-ILC-252 | 51 | Invasive Lobular Carcinoma | Primary    | ER+/HER2- | MSK-IMPACT-468 |
| MSK-ILC-253 | 53 | Invasive Lobular Carcinoma | Primary    | ER+/HER2- | MSK-IMPACT-468 |
| MSK-ILC-254 | 72 | Invasive Lobular Carcinoma | Primary    | ER+/HER2- | MSK-IMPACT-468 |
| MSK-ILC-255 | 66 | Invasive Lobular Carcinoma | Primary    | ER+/HER2- | MSK-IMPACT-468 |
| MSK-ILC-256 | 64 | Invasive Lobular Carcinoma | Primary    | ER+/HER2- | MSK-IMPACT-468 |
| MSK-ILC-257 | 75 | Invasive Lobular Carcinoma | Primary    | ER+/HER2- | MSK-IMPACT-468 |
| MSK-ILC-258 | 73 | Invasive Lobular Carcinoma | Primary    | ER+/HER2- | MSK-IMPACT-468 |
| MSK-ILC-259 | 56 | Invasive Lobular Carcinoma | Primary    | ER+/HER2- | MSK-IMPACT-468 |
| MSK-META-1  | 54 | Metaplastic Carcinoma      | Primary    | ER-/HER2- | MSK-IMPACT-410 |
| MSK-META-2  | 34 | Metaplastic Carcinoma      | Metastasis | ER-/HER2- | MSK-IMPACT-341 |
| MSK-META-3  | 53 | Metaplastic Carcinoma      | Metastasis | ER-/HER2- | MSK-IMPACT-410 |
| MSK-META-4  | 41 | Metaplastic Carcinoma      | Metastasis | ER+/HER2- | MSK-IMPACT-410 |
| MSK-META-5  | 43 | Metaplastic Carcinoma      | Primary    | ER-/HER2- | MSK-IMPACT-341 |
| MSK-META-6  | 64 | Metaplastic Carcinoma      | Primary    | ER+/HER2- | MSK-IMPACT-341 |
| MSK-META-7  | 59 | Metaplastic Carcinoma      | Metastasis | ER-/HER2- | MSK-IMPACT-341 |
| MSK-META-8  | 45 | Metaplastic Carcinoma      | Metastasis | ER-/HER2- | MSK-IMPACT-410 |
| MSK-META-9  | 39 | Metaplastic Carcinoma      | Primary    | ER-/HER2- | MSK-IMPACT-341 |
| MSK-META-10 | 47 | Metaplastic Carcinoma      | Metastasis | ER-/HER2- | MSK-IMPACT-341 |
| MSK-META-11 | 53 | Metaplastic Carcinoma      | Primary    | ER-/HER2- | MSK-IMPACT-468 |
| MSK-MPC-1   | 81 | Micropapillary Carcinoma   | Primary    | ER+/HER2- | MSK-IMPACT-468 |
| MSK-MPC-2   | 38 | Micropapillary Carcinoma   | Primary    | ER+/HER2+ | MSK-IMPACT-410 |
| MSK-MPC-3   | 59 | Micropapillary Carcinoma   | Metastasis | ER+/HER2- | MSK-IMPACT-410 |
| MSK-MPC-4   | 51 | Micropapillary Carcinoma   | Metastasis | ER-/HER2- | MSK-IMPACT-410 |
| MSK-MPC-5   | 58 | Micropapillary Carcinoma   | Metastasis | ER+/HER2- | MSK-IMPACT-410 |
| MSK-MPC-6   | 46 | Micropapillary Carcinoma   | Primary    | ER+/HER2- | MSK-IMPACT-410 |
| MSK-MPC-7   | 44 | Micropapillary Carcinoma   | Primary    | ER-/HER2+ | MSK-IMPACT-468 |
| MSK-MPC-8   | 38 | Micropapillary Carcinoma   | Metastasis | ER-/HER2- | MSK-IMPACT-410 |
| MSK-MPC-9   | 41 | Micropapillary Carcinoma   | Metastasis | ER+/HER2+ | MSK-IMPACT-341 |
| MSK-MPC-10  | 67 | Micropapillary Carcinoma   | Primary    | ER+/HER2- | MSK-IMPACT-410 |
| MSK-MPC-11  | 41 | Micropapillary Carcinoma   | Primary    | ER+/HER2- | MSK-IMPACT-410 |
| MSK-MPC-12  | 63 | Micropapillary Carcinoma   | Metastasis | ER+/HER2- | MSK-IMPACT-410 |
| MSK-MPC-13  | 63 | Micropapillary Carcinoma   | Metastasis | ER+/HER2- | MSK-IMPACT-410 |
| MSK-MPC-14  | 32 | Micropapillary Carcinoma   | Metastasis | ER+/HER2- | MSK-IMPACT-410 |
| MSK-MPC-15  | 42 | Micropapillary Carcinoma   | Metastasis | ER+/HER2- | MSK-IMPACT-410 |
| MSK-MPC-16  | 64 | Micropapillary Carcinoma   | Metastasis | ER+/HER2- | MSK-IMPACT-410 |
| MSK-MPC-17  | 59 | Micropapillary Carcinoma   | Primary    | ER+/HER2+ | MSK-IMPACT-410 |
| MSK-MPC-18  | 62 | Micropapillary Carcinoma   | Metastasis | ER+/HER2- | MSK-IMPACT-410 |
| MSK-MPC-19  | 53 | Micropapillary Carcinoma   | Primary    | ER+/HER2- | MSK-IMPACT-410 |
| MSK-MPC-20  | 66 | Micropapillary Carcinoma   | Metastasis | ER+/HER2- | MSK-IMPACT-468 |
| MSK-MUC-1   | 57 | Mixed Mucinous Carcinoma   | Primary    | ER+/HER2- | MSK-IMPACT-410 |
| MSK-MUC-2   | 71 | Mixed Mucinous Carcinoma   | Metastasis | ER+/HER2- | MSK-IMPACT-410 |
| MSK-MUC-3   | 56 | Mixed Mucinous Carcinoma   | Primary    | ER+/HER2- | MSK-IMPACT-468 |
| MSK-MUC-4   | 36 | Mixed Mucinous Carcinoma   | Metastasis | ER+/HER2- | MSK-IMPACT-410 |
| MSK-MUC-5   | 62 | Mixed Mucinous Carcinoma   | Metastasis | ER+/HER2- | MSK-IMPACT-341 |

Supplementary Table 2

Page 6

|            |    |                          |            |           |                |
|------------|----|--------------------------|------------|-----------|----------------|
| MSK-MUC-6  | 54 | Mixed Mucinous Carcinoma | Primary    | ER+/HER2- | MSK-IMPACT-468 |
| MSK-MUC-7  | 32 | Mixed Mucinous Carcinoma | Metastasis | ER+/HER2- | MSK-IMPACT-410 |
| MSK-MUC-8  | 47 | Mixed Mucinous Carcinoma | Primary    | ER+/HER2- | MSK-IMPACT-341 |
| MSK-MUC-9  | 29 | Mixed Mucinous Carcinoma | Primary    | ER+/HER2+ | MSK-IMPACT-341 |
| MSK-MUC-10 | 50 | Mixed Mucinous Carcinoma | Primary    | ER+/HER2+ | MSK-IMPACT-410 |
| MSK-MUC-11 | 63 | Mixed Mucinous Carcinoma | Primary    | ER+/HER2- | MSK-IMPACT-410 |
| MSK-MUC-12 | 36 | Mixed Mucinous Carcinoma | Primary    | ER+/HER2- | MSK-IMPACT-410 |
| MSK-MUC-13 | 40 | Mixed Mucinous Carcinoma | Primary    | ER+/HER2- | MSK-IMPACT-468 |
| MSK-MUC-14 | 46 | Mixed Mucinous Carcinoma | Primary    | ER+/HER2+ | MSK-IMPACT-410 |
| MSK-MUC-15 | 58 | Mixed Mucinous Carcinoma | Metastasis | ER+/HER2- | MSK-IMPACT-410 |
| MSK-MUC-16 | 32 | Mixed Mucinous Carcinoma | Primary    | ER+/HER2- | MSK-IMPACT-410 |
| MSK-MUC-17 | 46 | Mixed Mucinous Carcinoma | Primary    | ER+/HER2- | MSK-IMPACT-468 |
| MSK-MUC-18 | 62 | Mixed Mucinous Carcinoma | Primary    | ER+/HER2- | MSK-IMPACT-468 |
| MSK-MUC-19 | 46 | Mixed Mucinous Carcinoma | Primary    | ER+/HER2- | MSK-IMPACT-468 |

Supplementary Table 3. Comparison of the frequency of altered genes in breast cancers of histologic special type and invasive ductal carcinomas of no special type matched by clinicopathologic characteristics subjected to targeted massively parallel sequencing (MSK-IMPACT)

| Gene Name | Invasive lobular carcinoma  |                                 |                          |                      | Mixed mucinous breast carcinoma |                                                |                                     |                      | Micropapillary breast cancer  |                                      |                        |                      | Metaplastic breast cancer          |                                                |                                 |                      |
|-----------|-----------------------------|---------------------------------|--------------------------|----------------------|---------------------------------|------------------------------------------------|-------------------------------------|----------------------|-------------------------------|--------------------------------------|------------------------|----------------------|------------------------------------|------------------------------------------------|---------------------------------|----------------------|
|           | Metastasis<br>LC<br>(n=132) | Metastasis<br>DC-NST<br>(n=244) | Primary<br>LC<br>(n=127) | P value*<br>q value* | Metastasis<br>DC-NST<br>(n=15)  | Metastasis<br>Primary mixed<br>mucinous (n=14) | Primary mixed<br>mucinous<br>(n=14) | P value*<br>q value* | Metastasis<br>Micro<br>(n=12) | Metastasis<br>Primary<br>Micro (n=4) | Primary<br>Micro (n=4) | P value*<br>q value* | Metastasis<br>Metaplastic<br>(n=6) | Metastasis<br>Primary<br>Metaplastic<br>(n=18) | Primary<br>Metaplastic<br>(n=5) | P value*<br>q value* |
| ABL1      | 0 (0.0%)                    | 0 (0.0%)                        | 0 (0.0%)                 | 0.005                | 0.64512                         | 0.2474                                         | 1                                   | 1                    | 0 (0.0%)                      | 0 (0.0%)                             | 0 (0.0%)               | 0.25                 | 1                                  | 1                                              | 0 (0.0%)                        | 0 (0.0%)             |
| ACT1      | 10 (7.6%)                   | 20 (8.2%)                       | 1 (0.8%)                 | 0.047                | 0.141                           | 0 (0.0%)                                       | 0 (0.0%)                            | 1                    | 1                             | 1                                    | 1                      | 0 (0.0%)             | 0 (0.0%)                           | 0 (0.0%)                                       | 0.1686                          | 1                    |
| ACT2      | 1 (0.7%)                    | 3 (1.1%)                        | 0 (0.0%)                 | 1                    | 1                               | 0 (0.0%)                                       | 0 (0.0%)                            | 1                    | 1                             | 1                                    | 1                      | 0 (0.0%)             | 0 (0.0%)                           | 0 (0.0%)                                       | 0.4457                          | 1                    |
| ACT3      | 1 (0.7%)                    | 2 (0.7%)                        | 0 (0.0%)                 | 0.224                | 0.224                           | 0 (0.0%)                                       | 0 (0.0%)                            | 1                    | 1                             | 1                                    | 1                      | 0 (0.0%)             | 0 (0.0%)                           | 0 (0.0%)                                       | 0.4457                          | 1                    |
| ALX1      | 5 (3.7%)                    | 3 (1.1%)                        | 0 (0.0%)                 | 0.124                | 0.895125                        | 0.0603                                         | 1                                   | 1                    | 0 (0.0%)                      | 0 (0.0%)                             | 0 (0.0%)               | 1                    | 1                                  | 0 (0.0%)                                       | 0 (0.0%)                        | 0.4457               |
| ALX2      | 1 (0.7%)                    | 2 (0.7%)                        | 0 (0.0%)                 | 0.6034               | 0.6034                          | 0 (0.0%)                                       | 0 (0.0%)                            | 1                    | 1                             | 1                                    | 1                      | 0 (0.0%)             | 0 (0.0%)                           | 0 (0.0%)                                       | 0.4457                          | 1                    |
| AREB1     | 1 (0.7%)                    | 2 (0.7%)                        | 0 (0.0%)                 | 0.6034               | 0.6034                          | 0 (0.0%)                                       | 0 (0.0%)                            | 1                    | 1                             | 1                                    | 1                      | 0 (0.0%)             | 0 (0.0%)                           | 0 (0.0%)                                       | 0.4457                          | 1                    |
| APC       | 7 (5.3%)                    | 6 (2.2%)                        | 0 (0.0%)                 | 0.181                | 0.847148                        | 0.0145                                         | 0.66936                             | 0 (0.0%)             | 0 (0.0%)                      | 0 (0.0%)                             | 0 (0.0%)               | 1                    | 1                                  | 0 (0.0%)                                       | 0 (0.0%)                        | 0.4457               |
| AR        | 5 (3.7%)                    | 7 (2.6%)                        | 1 (0.7%)                 | 0.544                | 1                               | 1                                              | 1                                   | 1                    | 1                             | 1                                    | 1                      | 0 (0.0%)             | 0 (0.0%)                           | 0 (0.0%)                                       | 0.4457                          | 1                    |
| ARAF      | 0 (0.0%)                    | 5 (1.8%)                        | 0 (0.0%)                 | 0.1742               | 0.9625                          | 0.0603                                         | 1                                   | 1                    | 1                             | 1                                    | 1                      | 0 (0.0%)             | 0 (0.0%)                           | 0 (0.0%)                                       | 0.4457                          | 1                    |
| ARID1A    | 11 (8.3%)                   | 19 (7.2%)                       | 10 (7.8%)                | 0.181                | 0.979923                        | 0.6029                                         | 1                                   | 1                    | 1                             | 1                                    | 1                      | 0 (0.0%)             | 0 (0.0%)                           | 0 (0.0%)                                       | 0.4457                          | 1                    |
| ARID1B    | 3 (2.2%)                    | 6 (2.2%)                        | 1 (0.7%)                 | 0.124                | 0.124                           | 0 (0.0%)                                       | 0 (0.0%)                            | 1                    | 1                             | 1                                    | 1                      | 0 (0.0%)             | 0 (0.0%)                           | 0 (0.0%)                                       | 0.4457                          | 1                    |
| ARID2     | 4 (3.0%)                    | 8 (3.0%)                        | 0 (0.0%)                 | 1                    | 1                               | 1                                              | 1                                   | 1                    | 1                             | 1                                    | 1                      | 0 (0.0%)             | 0 (0.0%)                           | 0 (0.0%)                                       | 0.4457                          | 1                    |
| ARID3B    | 4 (3.0%)                    | 6 (2.2%)                        | 0 (0.0%)                 | 0.482                | 0.482                           | 0 (0.0%)                                       | 0 (0.0%)                            | 1                    | 1                             | 1                                    | 1                      | 0 (0.0%)             | 0 (0.0%)                           | 0 (0.0%)                                       | 0.4457                          | 1                    |
| ASB1      | 2 (1.5%)                    | 2 (0.7%)                        | 1 (0.7%)                 | 0.6034               | 1                               | 1                                              | 1                                   | 1                    | 1                             | 1                                    | 1                      | 0 (0.0%)             | 0 (0.0%)                           | 0 (0.0%)                                       | 0.4457                          | 1                    |
| ATM       | 3 (2.2%)                    | 3 (1.1%)                        | 0 (0.0%)                 | 0.6034               | 0.6034                          | 0 (0.0%)                                       | 0 (0.0%)                            | 1                    | 1                             | 1                                    | 1                      | 0 (0.0%)             | 0 (0.0%)                           | 0 (0.0%)                                       | 0.4457                          | 1                    |
| ATM1      | 7 (5.3%)                    | 8 (3.0%)                        | 0 (0.0%)                 | 0.243                | 0.243                           | 0 (0.0%)                                       | 0 (0.0%)                            | 0.25                 | 1                             | 0.2632                               | 1                      | 0 (0.0%)             | 0 (0.0%)                           | 0 (0.0%)                                       | 0.4457                          | 1                    |
| ATR       | 4 (3.0%)                    | 7 (2.6%)                        | 2 (1.5%)                 | 1                    | 1                               | 0.842                                          | 1                                   | 1                    | 1                             | 1                                    | 1                      | 0 (0.0%)             | 0 (0.0%)                           | 0 (0.0%)                                       | 0.4457                          | 1                    |
| ATRX      | 4 (3.0%)                    | 6 (2.2%)                        | 2 (1.5%)                 | 0.789                | 1                               | 1                                              | 1                                   | 1                    | 1                             | 1                                    | 1                      | 0 (0.0%)             | 0 (0.0%)                           | 0 (0.0%)                                       | 0.4457                          | 1                    |
| AURKA     | 1 (0.7%)                    | 18 (6.5%)                       | 1 (0.7%)                 | 0.055                | 0.234375                        | 1                                              | 1                                   | 1                    | 1                             | 1                                    | 1                      | 0 (0.0%)             | 0 (0.0%)                           | 0 (0.0%)                                       | 0.4457                          | 1                    |
| AURKB     | 1 (0.7%)                    | 0 (0.0%)                        | 0 (0.0%)                 | 0.333                | 1                               | 1                                              | 1                                   | 1                    | 1                             | 1                                    | 1                      | 0 (0.0%)             | 0 (0.0%)                           | 0 (0.0%)                                       | 0.4457                          | 1                    |
| AXIN1     | 0 (0.0%)                    | 0 (0.0%)                        | 0 (0.0%)                 | 0.544                | 1                               | 0.403                                          | 1                                   | 1                    | 1                             | 1                                    | 1                      | 0 (0.0%)             | 0 (0.0%)                           | 0 (0.0%)                                       | 0.4457                          | 1                    |
| AXIN2     | 2 (1.5%)                    | 9 (3.4%)                        | 0 (0.0%)                 | 0.349                | 1                               | 0.482                                          | 1                                   | 1                    | 1                             | 1                                    | 1                      | 0 (0.0%)             | 0 (0.0%)                           | 0 (0.0%)                                       | 0.4457                          | 1                    |
| AZ1       | 1 (0.7%)                    | 3 (1.1%)                        | 0 (0.0%)                 | 1                    | 1                               | 1                                              | 1                                   | 1                    | 1                             | 1                                    | 1                      | 0 (0.0%)             | 0 (0.0%)                           | 0 (0.0%)                                       | 0.4457                          | 1                    |
| BAD1      | 0 (0.0%)                    | 1 (0.3%)                        | 0 (0.0%)                 | 1                    | 1                               | 1                                              | 1                                   | 1                    | 1                             | 1                                    | 1                      | 0 (0.0%)             | 0 (0.0%)                           | 0 (0.0%)                                       | 0.4457                          | 1                    |
| BAP1      | 2 (1.5%)                    | 2 (0.7%)                        | 0 (0.0%)                 | 0.6034               | 0.6034                          | 0 (0.0%)                                       | 0 (0.0%)                            | 1                    | 1                             | 1                                    | 1                      | 0 (0.0%)             | 0 (0.0%)                           | 0 (0.0%)                                       | 0.4457                          | 1                    |
| BARD1     | 2 (1.5%)                    | 2 (0.7%)                        | 0 (0.0%)                 | 0.6034               | 0.6034                          | 0 (0.0%)                                       | 0 (0.0%)                            | 1                    | 1                             | 1                                    | 1                      | 0 (0.0%)             | 0 (0.0%)                           | 0 (0.0%)                                       | 0.4457                          | 1                    |
| BCL2      | 1 (0.7%)                    | 1 (0.3%)                        | 0 (0.0%)                 | 1                    | 1                               | 1                                              | 1                                   | 1                    | 1                             | 1                                    | 1                      | 0 (0.0%)             | 0 (0.0%)                           | 0 (0.0%)                                       | 0.4457                          | 1                    |
| BCL2L1    | 0 (0.0%)                    | 0 (0.0%)                        | 0 (0.0%)                 | 0.333                | 1                               | 1                                              | 1                                   | 1                    | 1                             | 1                                    | 1                      | 0 (0.0%)             | 0 (0.0%)                           | 0 (0.0%)                                       | 0.4457                          | 1                    |
| BCL2L11   | 0 (0.0%)                    | 0 (0.0%)                        | 0 (0.0%)                 | 0.333                | 1                               | 1                                              | 1                                   | 1                    | 1                             | 1                                    | 1                      | 0 (0.0%)             | 0 (0.0%)                           | 0 (0.0%)                                       | 0.4457                          | 1                    |
| BCL6      | 3 (2.2%)                    | 3 (1.1%)                        | 2 (1.5%)                 | 0.649                | 1                               | 1                                              | 1                                   | 1                    | 1                             | 1                                    | 1                      | 0 (0.0%)             | 0 (0.0%)                           | 0 (0.0%)                                       | 0.4457                          | 1                    |
| BCL7A     | 1 (0.7%)                    | 1 (0.3%)                        | 0 (0.0%)                 | 0.6034               | 0.6034                          | 0 (0.0%)                                       | 0 (0.0%)                            | 1                    | 1                             | 1                                    | 1                      | 0 (0.0%)             | 0 (0.0%)                           | 0 (0.0%)                                       | 0.4457                          | 1                    |
| BLM       | 5 (3.7%)                    | 1 (0.3%)                        | 0 (0.0%)                 | 0.071                | 0.448462                        | 0.0603                                         | 1                                   | 1                    | 1                             | 1                                    | 1                      | 0 (0.0%)             | 0 (0.0%)                           | 0 (0.0%)                                       | 0.4457                          | 1                    |
| BRCA1     | 0 (0.0%)                    | 4 (1.5%)                        | 0 (0.0%)                 | 0.306                | 1                               | 1                                              | 1                                   | 1                    | 1                             | 1                                    | 1                      | 0 (0.0%)             | 0 (0.0%)                           | 0 (0.0%)                                       | 0.4457                          | 1                    |
| BRCA2     | 2 (1.5%)                    | 9 (3.4%)                        | 0 (0.0%)                 | 0.349                | 1                               | 0.482                                          | 1                                   | 1                    | 1                             | 1                                    | 1                      | 0 (0.0%)             | 0 (0.0%)                           | 0 (0.0%)                                       | 0.4457                          | 1                    |
| BRD4      | 2 (1.5%)                    | 11 (4.1%)                       | 0 (0.0%)                 | 0.091                | 0.31031                         | 0.2474                                         | 1                                   | 1                    | 0.004                         | 1                                    | 1                      | 0 (0.0%)             | 0 (0.0%)                           | 0 (0.0%)                                       | 0.4457                          | 1                    |
| BRD9      | 1 (0.7%)                    | 1 (0.3%)                        | 0 (0.0%)                 | 0.6034               | 0.6034                          | 0 (0.0%)                                       | 0 (0.0%)                            | 1                    | 1                             | 1                                    | 1                      | 0 (0.0%)             | 0 (0.0%)                           | 0 (0.0%)                                       | 0.4457                          | 1                    |
| BRG1      | 1 (0.7%)                    | 6 (2.2%)                        | 0 (0.0%)                 | 0.424                | 1                               | 1                                              | 1                                   | 1                    | 1                             | 1                                    | 1                      | 0 (0.0%)             | 0 (0.0%)                           | 0 (0.0%)                                       | 0.4457                          | 1                    |
| BRN1      | 2 (1.5%)                    | 2 (0.7%)                        | 0 (0.0%)                 | 0.6034               | 0.6034                          | 0 (0.0%)                                       | 0 (0.0%)                            | 1                    | 1                             | 1                                    | 1                      | 0 (0.0%)             | 0 (0.0%)                           | 0 (0.0%)                                       | 0.4457                          | 1                    |
| BRN2      | 5 (3.7%)                    | 17 (6.4%)                       | 10 (7.8%)                | 0.354                | 1                               | 0.186                                          | 1                                   | 0.2632               | 1                             | 0.2632                               | 1                      | 0 (0.0%)             | 0 (0.0%)                           | 0 (0.0%)                                       | 0.4457                          | 1                    |
| BRN3      | 1 (0.7%)                    | 0 (0.0%)                        | 0 (0.0%)                 | 0.6034               | 0.6034                          | 0 (0.0%)                                       | 0 (0.0%)                            | 1                    | 1                             | 1                                    | 1                      | 0 (0.0%)             | 0 (0.0%)                           | 0 (0.0%)                                       | 0.4457                          | 1                    |
| BRN4      | 1 (0.7%)                    | 1 (0.3%)                        | 0 (0.0%)                 | 0.6034               | 0.6034                          | 0 (0.0%)                                       | 0 (0.0%)                            | 1                    | 1                             | 1                                    | 1                      | 0 (0.0%)             | 0 (0.0%)                           | 0 (0.0%)                                       | 0.4457                          | 1                    |
| BRN5      | 1 (0.7%)                    | 1 (0.3%)                        | 0 (0.0%)                 | 0.6034               | 0.6034                          | 0 (0.0%)                                       | 0 (0.0%)                            | 1                    | 1                             | 1                                    | 1                      | 0 (0.0%)             | 0 (0.0%)                           | 0 (0.0%)                                       | 0.4457                          | 1                    |
| BRN6      | 1 (0.7%)                    | 1 (0.3%)                        | 0 (0.0%)                 | 0.6034               | 0.6034                          | 0 (0.0%)                                       | 0 (0.0%)                            | 1                    | 1                             | 1                                    | 1                      | 0 (0.0%)             | 0 (0.0%)                           | 0 (0.0%)                                       | 0.4457                          | 1                    |
| BRN7      | 1 (0.7%)                    | 1 (0.3%)                        | 0 (0.0%)                 | 0.6034               | 0.6034                          | 0 (0.0%)                                       | 0 (0.0%)                            | 1                    | 1                             | 1                                    | 1                      | 0 (0.0%)             | 0 (0.0%)                           | 0 (0.0%)                                       | 0.4457                          | 1                    |
| BRN8      | 1 (0.7%)                    | 1 (0.3%)                        | 0 (0.0%)                 | 0.6034               | 0.6034                          | 0 (0.0%)                                       | 0 (0.0%)                            | 1                    | 1                             | 1                                    | 1                      | 0 (0.0%)             | 0 (0.0%)                           | 0 (0.0%)                                       | 0.4457                          | 1                    |
| BRN9      | 1 (0.7%)                    | 1 (0.3%)                        | 0 (0.0%)                 | 0.6034               | 0.6034                          | 0 (0.0%)                                       | 0 (0.0%)                            | 1                    | 1                             | 1                                    | 1                      | 0 (0.0%)             | 0 (0.0%)                           | 0 (0.0%)                                       | 0.4457                          | 1                    |
| BRN10     | 1 (0.7%)                    | 1 (0.3%)                        | 0 (0.0%)                 | 0.6034               | 0.6034                          | 0 (0.0%)                                       | 0 (0.0%)                            | 1                    | 1                             | 1                                    | 1                      | 0 (0.0%)             | 0 (0.0%)                           | 0 (0.0%)                                       | 0.4457                          | 1                    |
| BRN11     | 1 (0.7%)                    | 1 (0.3%)                        | 0 (0.0%)                 | 0.6034               | 0.6034                          | 0 (0.0%)                                       | 0 (0.0%)                            | 1                    | 1                             | 1                                    | 1                      | 0 (0.0%)             | 0 (0.0%)                           | 0 (0.0%)                                       | 0.4457                          | 1                    |
| BRN12     | 1 (0.7%)                    | 1 (0.3%)                        | 0 (0.0%)                 | 0.6034               | 0.6034                          | 0 (0.0%)                                       | 0 (0.0%)                            | 1                    | 1                             | 1                                    | 1                      | 0 (0.0%)             | 0 (0.0%)                           | 0 (0.0%)                                       | 0.4457                          | 1                    |
| BRN13     | 1 (0.7%)                    | 1 (0.3%)                        | 0 (0.0%)                 | 0.6034               | 0.6034                          | 0 (0.0%)                                       | 0 (0.0%)                            | 1                    | 1                             | 1                                    | 1                      | 0 (0.0%)             | 0 (0.0%)                           | 0 (0.0%)                                       | 0.4457                          | 1                    |
| BRN14     | 1 (0.7%)                    | 1 (0.3%)                        | 0 (0.0%)                 | 0.6034               | 0.6034                          | 0 (0.0%)                                       | 0 (0.0%)                            | 1                    | 1                             | 1                                    | 1                      | 0 (0.0%)             | 0 (0.0%)                           | 0 (0.0%)                                       | 0.4457                          | 1                    |
| BRN15     | 1 (0.7%)                    | 1 (0.3%)                        | 0 (0.0%)                 | 0.6034               | 0.6034                          | 0 (0.0%)                                       | 0 (0.0%)                            | 1                    | 1                             | 1                                    | 1                      | 0 (0.0%)             | 0 (0.0%)                           | 0 (0.0%)                                       | 0.4457                          | 1                    |
| BRN16     | 1 (0.7%)                    | 1 (0.3%)                        | 0 (0.0%)                 | 0.6034               | 0.6034                          | 0 (0.0%)                                       | 0 (0.0%)                            | 1                    | 1                             | 1                                    | 1                      | 0 (0.0%)             | 0 (0.0%)                           | 0 (0.0%)                                       | 0.4457                          | 1                    |
| BRN17     | 1 (0.7%)                    | 1 (0.3%)                        | 0 (0.0%)                 | 0.6034               | 0.6034                          | 0 (0.0%)                                       | 0 (0.0%)                            | 1                    | 1                             | 1                                    | 1                      | 0 (0.0%)             | 0 (0.0%)                           | 0 (0.0%)                                       | 0.4457                          | 1                    |
| BRN18     | 1 (0.7%)                    | 1 (0.3%)                        | 0 (0.0%)                 | 0.6034               | 0.6034                          | 0 (0.0%)                                       | 0 (0.0%)                            | 1                    | 1                             | 1                                    | 1                      | 0 (0.0%)             | 0 (0.0%)                           | 0 (0.0%)                                       | 0.4457                          | 1                    |
| BRN19     | 1 (0.7%)                    | 1 (0.3%)                        | 0 (0.0%)                 | 0.6034               | 0.6034                          | 0 (0.0%)                                       | 0 (0.0%)                            | 1                    | 1                             | 1                                    | 1                      | 0 (0.0%)             | 0 (0.0%)                           | 0 (0.0%)                                       | 0.4457                          | 1                    |
| BRN20     | 1 (0.7%)                    | 1 (0.3%)                        | 0 (0.0%)                 | 0.6034               | 0.6034                          | 0 (0.0%)                                       | 0 (0.0%)                            | 1                    | 1                             | 1                                    | 1                      | 0 (0.0%)             | 0 (0.0%)                           | 0 (0.0%)                                       | 0.4457                          | 1                    |
| BRN21     | 1 (0.7%)                    | 1 (0.3%)                        | 0 (0.0%)                 | 0.6034               | 0.6034                          | 0 (0.0%)                                       | 0 (0.0%)                            | 1                    | 1                             | 1                                    | 1                      | 0 (0.0%)             | 0 (0.0%)                           | 0 (0.0%)                                       | 0.4457                          | 1                    |
| BRN22     | 1 (0.7%)                    | 1 (0.3%)                        | 0 (0.0%)                 | 0.6034               | 0.6034                          | 0 (0.0%)                                       | 0 (0.0%)                            | 1                    | 1                             | 1                                    | 1                      | 0 (0.0%)             | 0 (0.0%)                           | 0 (0.0%)                                       | 0.4457                          | 1                    |
| BRN23     | 1 (0.7%)                    | 1 (0.3%)                        | 0 (0.0%)                 | 0.6034               | 0.6034                          | 0 (0.0%)                                       | 0 (0.0%)                            | 1                    | 1                             | 1                                    | 1                      | 0 (0.0%)             | 0 (0.0%)                           | 0 (0.0%)                                       | 0.4457                          | 1                    |
| BRN24     | 1 (0.7%)                    | 1 (0.3%)                        | 0 (0.0%)                 | 0.6034               | 0.6034                          | 0 (0.0%)                                       | 0 (0.0%)                            | 1                    | 1                             | 1                                    | 1                      | 0 (0.0%)             | 0 (0.0%)                           | 0 (0.0%)                                       | 0.4457                          | 1                    |
| BRN25     | 1 (0.7%)                    | 1 (0.3%)                        | 0 (0.0%)                 | 0.6034               | 0.6034                          | 0 (0.0%)                                       | 0 (0.0%)                            | 1                    | 1                             | 1                                    | 1                      | 0 (0.0%)             | 0 (0.0%)                           | 0 (0.0%)                                       | 0.4457                          | 1                    |
| BRN26     | 1 (0.7%)                    | 1 (0.3%)                        | 0 (0.0%)                 | 0.6034               | 0.6034                          | 0 (0.0%)                                       | 0 (0.0%)                            | 1                    | 1                             | 1                                    | 1                      | 0 (0.0%)             | 0 (0.0%)                           | 0 (0.0%)                                       | 0.4457                          | 1                    |
| BRN27     | 1 (0.7%)                    | 1 (0.3%)                        | 0 (0.0%)                 | 0.6034               | 0.6034                          | 0 (0.0%)                                       | 0 (0.0%)                            | 1                    | 1                             | 1                                    | 1                      | 0 (0.0%)             | 0 (0.0%)                           | 0 (0.0%)                                       | 0.4457                          | 1                    |
| BRN28     | 1 (0.7%)                    | 1 (0.3%)                        | 0 (0.0%)                 | 0.6034               | 0.6034                          | 0 (0.0%)                                       | 0 (0.0%)                            | 1                    | 1                             | 1                                    | 1                      | 0 (0.0%)             | 0 (0.0%)                           | 0 (0.0%)                                       | 0.4457                          | 1                    |
| BRN29     | 1 (0.7%)                    | 1 (0.3%)                        | 0 (0.0%)                 | 0.6034               | 0.6034                          | 0 (0.0%)                                       | 0 (0.0%)                            | 1                    | 1                             | 1                                    | 1                      | 0 (0.0%)             | 0 (0.0%)                           | 0 (0.0%)                                       | 0.4457                          | 1                    |
| BRN30     | 1 (0.7%)                    | 1 (0.3%)                        | 0 (0.0%)                 | 0.6034               | 0.6034                          | 0 (0.0%)                                       | 0 (0.0%)                            | 1                    | 1                             | 1                                    | 1                      | 0 (0.0%)             | 0 (0.0%)                           | 0 (0.0%)                                       | 0.4457                          | 1                    |
| BRN31     | 1 (0.7%)                    | 1 (0.3%)                        | 0 (0.0%)                 | 0.6034               | 0.6034                          | 0 (0.0%)                                       | 0 (0.0%)                            | 1                    | 1                             | 1                                    | 1                      | 0 (0.0%)             | 0 (0.0%)                           | 0 (0.0%)                                       | 0.4457                          | 1                    |
| BRN32     | 1 (0.7%)                    | 1 (0.3%)                        | 0 (0.0%)                 | 0.6034               | 0.6034                          | 0 (0.0%)                                       | 0 (0.0%)                            | 1                    | 1                             | 1                                    | 1                      | 0 (0.0%)             | 0 (0.0%)                           | 0 (0.0%)                                       | 0.4457                          | 1                    |
| BRN33     | 1 (0.7%)                    | 1 (0.3%)                        | 0 (0.0%)                 | 0.6034               | 0.6034                          | 0 (0.0%)                                       | 0 (0.0%)                            | 1                    | 1                             | 1                                    | 1                      | 0 (0.0%)             | 0 (0.0%)                           | 0 (0.0%)                                       | 0.4457                          | 1                    |
| BRN34     | 1 (0.7%)                    | 1 (0.3%)                        | 0 (0.0%)                 | 0.6034               | 0.6034                          | 0 (0.0%)                                       | 0 (0.0%)                            | 1                    | 1                             | 1                                    | 1                      | 0 (0.0%)             | 0 (0.0%)                           | 0 (0.0%)                                       | 0.4457                          | 1                    |
| BRN35     | 1 (0.7%)                    | 1 (0.3%)                        | 0 (0.0%)                 | 0.6034               | 0.6034                          | 0 (0.0%)                                       | 0 (0.0%)                            | 1                    | 1                             | 1                                    | 1                      | 0 (0.0%)             | 0 (0.0%)                           | 0 (0.0%)                                       | 0.4457                          | 1                    |
| BRN36     | 1 (0.7%)                    | 1 (0.3%)                        | 0 (0.0%)                 | 0.6034               | 0.6034                          | 0 (0.0%)                                       | 0 (0.0%)                            | 1                    | 1                             | 1                                    | 1                      | 0 (0.0%)             | 0 (0.0%)                           | 0 (0.0%)                                       | 0.4457                          | 1                    |
| BRN37     |                             |                                 |                          |                      |                                 |                                                |                                     |                      |                               |                                      |                        |                      |                                    |                                                |                                 |                      |













**Supplementary Table 5. Therapy received prior to sampling of metastatic lobular carcinomas according to *ERBB2* mutational status**

| <b>Pre-biopsy therapy</b>                           | <b><i>ERBB2</i><br/>L755S (n=7)</b> | <b>Other <i>ERBB2</i><br/>mutations (n =9)</b> | <b>No <i>ERBB2</i><br/>mutations (n=98)</b>  | <b><i>P</i> value*</b> |
|-----------------------------------------------------|-------------------------------------|------------------------------------------------|----------------------------------------------|------------------------|
| Chemotherapy-containing                             | 0 (0%)                              | 0 (0%)                                         | 4 (4.1%)                                     | n.s.                   |
| Chemotherapy-containing/Anti-HER2                   | 0 (0%)                              | 0 (0%)                                         | 1 (1%)                                       |                        |
| Chemotherapy-containing/Hormone-therapy             | 6 (85.7%)                           | 7 (77.8%)                                      | 72 (73.5%)                                   |                        |
| Chemotherapy-containing/Hormone-therapy/Anti-HER2   | 1 (14.3%)                           | 0 (0%)                                         | 4 (4.1%)                                     |                        |
| Anti-HER2                                           | 0 (0%)                              | 0 (0%)                                         | 3 (3.1%)                                     |                        |
| Hormone-therapy                                     | 0 (0%)                              | 1 (11.1%)                                      | 13 (13.3%)                                   |                        |
| Hormone-therapy/Anti-HER2                           | 0 (0%)                              | 1 (11.1%)                                      | 1 (1%)                                       |                        |
| <b>Last line of hormone therapy prior to biopsy</b> | <b><i>ERBB2</i><br/>L755S (n=7)</b> | <b>Other <i>ERBB2</i><br/>mutations (n =9)</b> | <b>No <i>ERBB2</i><br/>mutations (n =90)</b> | <b><i>P</i> value*</b> |
| Aromatase inhibitors                                | 5 (71.4%)                           | 6 (66.7%)                                      | 51 (56.7%)                                   | n.s.                   |
| Selective estrogen receptor degraders (SERD)        | 1 (14.3%)                           | 0 (0%)                                         | 11 (12.2%)                                   |                        |
| Selective estrogen receptor modulators (SERM)       | 1 (14.3%)                           | 3 (33.3%)                                      | 28 (31.1%)                                   |                        |

\*Chi square test

n.s., not significant

**Supplementary Table 6. Therapy received prior to sampling of metastatic lobular carcinomas according to *ERBB2* mutational status**

| Pre-biopsy therapy                                | mILC<br>(n=114) | mIDC<br>(n=235) | <i>P</i> value* | mMUC<br>(n=5) | mIDC<br>(n=13) | <i>P</i> value* | mMPC<br>(n=9) | mIDC<br>(n=33) | <i>P</i> value* | mMETA<br>(n=6) | mIDC<br>(n=18) | <i>P</i> value* |
|---------------------------------------------------|-----------------|-----------------|-----------------|---------------|----------------|-----------------|---------------|----------------|-----------------|----------------|----------------|-----------------|
| Chemotherapy-containing                           | 4 (3.5%)        | 27 (11.5%)      | n.s.            | 0 (0%)        | 1 (7.7%)       | n.s.            | 1 (11.1%)     | 4 (12.1%)      | n.s.            | 3 (50%)        | 8 (44.4%)      | n.s.            |
| Chemotherapy-containing/Anti-HER2                 | 1 (0.9%)        | 0 (0%)          |                 | 0 (0%)        | 0 (0%)         |                 | 0 (0%)        | 0 (0%)         |                 | 0 (0%)         | 0 (0%)         |                 |
| Chemotherapy-containing/Hormone-therapy           | 85 (74.6%)      | 158 (67.2%)     |                 | 3 (60%)       | 9 (69.2%)      |                 | 6 (66.7%)     | 26 (78.8%)     |                 | 2 (33.3%)      | 6 (33.3%)      |                 |
| Chemotherapy-containing/Hormone-therapy/Anti-HER2 | 5 (4.4%)        | 4 (1.7%)        |                 | 2 (40%)       | 0 (0%)         |                 | 0 (0%)        | 0 (0%)         |                 | 0 (0%)         | 0 (0%)         |                 |
| Anti-HER2                                         | 3 (2.6%)        | 5 (2.1%)        |                 | 0 (0%)        | 0 (0%)         |                 | 0 (0%)        | 0 (0%)         |                 | 1 (16.7%)      | 0 (0%)         |                 |
| Hormone-therapy                                   | 14 (12.3%)      | 30 (12.8%)      |                 | 0 (0%)        | 3 (23.1%)      |                 | 2 (22.2%)     | 3 (9.1%)       |                 | 0 (0%)         | 3 (16.7%)      |                 |
| Hormone-therapy/Anti-HER2                         | 2 (1.8%)        | 11 (4.7%)       |                 | 0 (0%)        | 0 (0%)         |                 | 0 (0%)        | 0 (0%)         |                 | 0 (0%)         | 1 (5.6%)       |                 |

\*Chi square test  
n.s., not significant
